# Supplementary material for: Thielavins W–Z7, New Antifouling Thielavins from the Marine-Derived Fungus Thielavia sp. UST030930-004
Source: Mar Drugs. 2017 Apr 29;15(5):128. doi: 10.3390/md15050128 (PMC5450534; doi:10.3390/md15050128)
Supplement: Supplementary file 1 [file marinedrugs-15-00128-s001.pdf]

# Thielavins W–Z<sub>7</sub>, New Antifouling Thielavins from the Marine-Derived Fungus *Thielavia* sp. UST030930-004

Zhuang Han<sup>1,2</sup>, Yong-Xin Li<sup>2</sup>, Ling-Li Liu<sup>2</sup>, Liang Lu<sup>2</sup>, Xian-Rong Guo<sup>3</sup>, Xi-Xiang Zhang<sup>4</sup>, Xiao-Yong Zhang<sup>5</sup>, Shu-Hua Qi<sup>5</sup>, Ying Xu<sup>2,6,\*</sup>, Pei-Yuan Qian<sup>2,\*</sup>

<sup>1</sup> Institute of Deep-sea Science and Engineering, Chinese Academy of Sciences, 28 Luhuitou Road, Sanya 572000, China; zhuanghan@idsse.ac.cn

<sup>2</sup> Division of Life Science, The Hong Kong University of Science and Technology, Clear Water Bay, Hong Kong, China; liyongxin@connect.ust.hk (Y.-X.L.); leonie@nwsuaf.edu.cn (L.-L.L.); luliangust@163.com (L.L.)

<sup>3</sup> Imaging & Characterization Core lab, King Abdullah University of Science and Technology, Thuwal 23955-6900, Saudi Arabia; xianrong.guo@kaust.edu.sa

<sup>4</sup> Physical Science and Engineering, King Abdullah University of Science and Technology, Thuwal 23955-6900, Saudi Arabia; xixiang.zhang@kaust.edu.sa

<sup>5</sup> Key Laboratory of Marine Bio-resources Sustainable Utilization, South China Sea Institute of Oceanology, Chinese Academy of Sciences, 164 West Xingang Road, Guangzhou 510301, China; zhangxiaoyong@scsio.ac.cn (X.-Y.Z.); shuhuaqi@scsio.ac.cn (S.-H.Q.)

<sup>6</sup> College of Life Science, Shenzhen University, 3688 Nanhai Ave, Shenzhen 518060, China

\* Correspondence: boxuying@szu.edu.cn (Y.X.); boqianpy@ust.hk (P.-Y.Q.); Tel.: +852-23587331 (P.-Y.Q.); Fax: +852-23581559 (P.-Y.Q.)

Figure S1-S7: 1D, 2D NMR, HRESIMS and ISCID spectra of Compound **1**  
Figure S8-S14: 1D, 2D NMR, HRESIMS and ISCID spectra of Compound **2**  
Figure S15-S21: 1D, 2D NMR, HRESIMS and ISCID spectra of Compound **3**  
Figure S22-S28: 1D, 2D NMR, HRESIMS and ISCID spectra of Compound **4**  
Figure S29-S35: 1D, 2D NMR, HRESIMS and ISCID spectra of Compound **5**  
Figure S36-S42: 1D, 2D NMR, HRESIMS and ISCID spectra of Compound **6**  
Figure S43-S49: 1D, 2D NMR, HRESIMS and ISCID spectra of Compound **7**  
Figure S50-S56: 1D, 2D NMR, HRESIMS and ISCID spectra of Compound **8**  
Figure S57-S63: 1D, 2D NMR, HRESIMS and ISCID spectra of Compound **9**  
Figure S64-S69: 1D, 2D NMR, HRESIMS and ISCID spectra of Compound **10**  
Figure S70-S75: 1D, 2D NMR, HRESIMS and ISCID spectra of Compound **11**

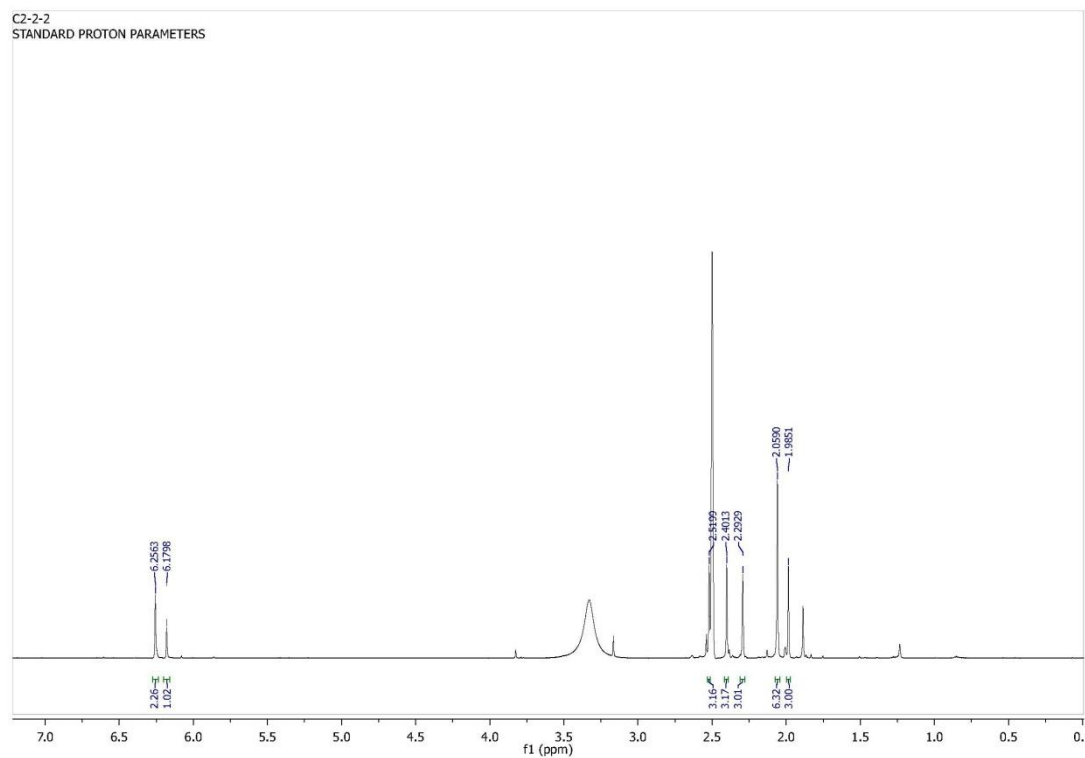

Figure S1  $^1\text{H}$  NMR spectrum of **1** in  $\text{DMSO-}d_6$  (500 MHz)

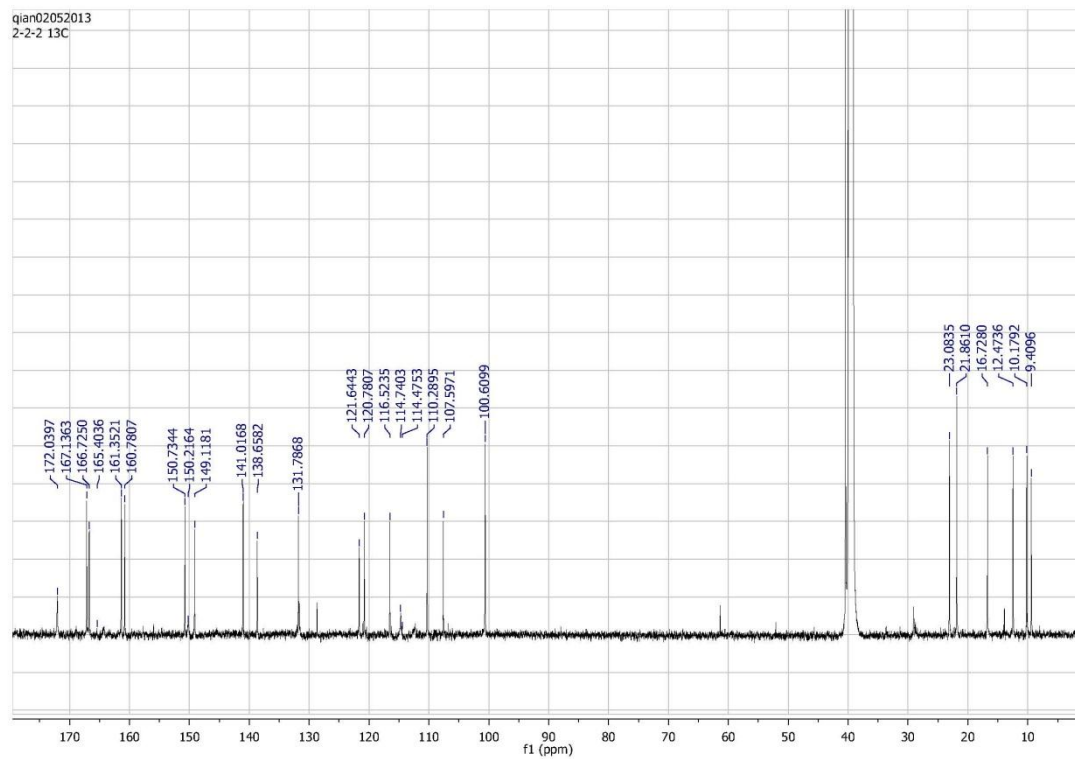

Figure S2  $^{13}\text{C}$  NMR spectrum of **1** in  $\text{DMSO-}d_6$  (125 MHz)

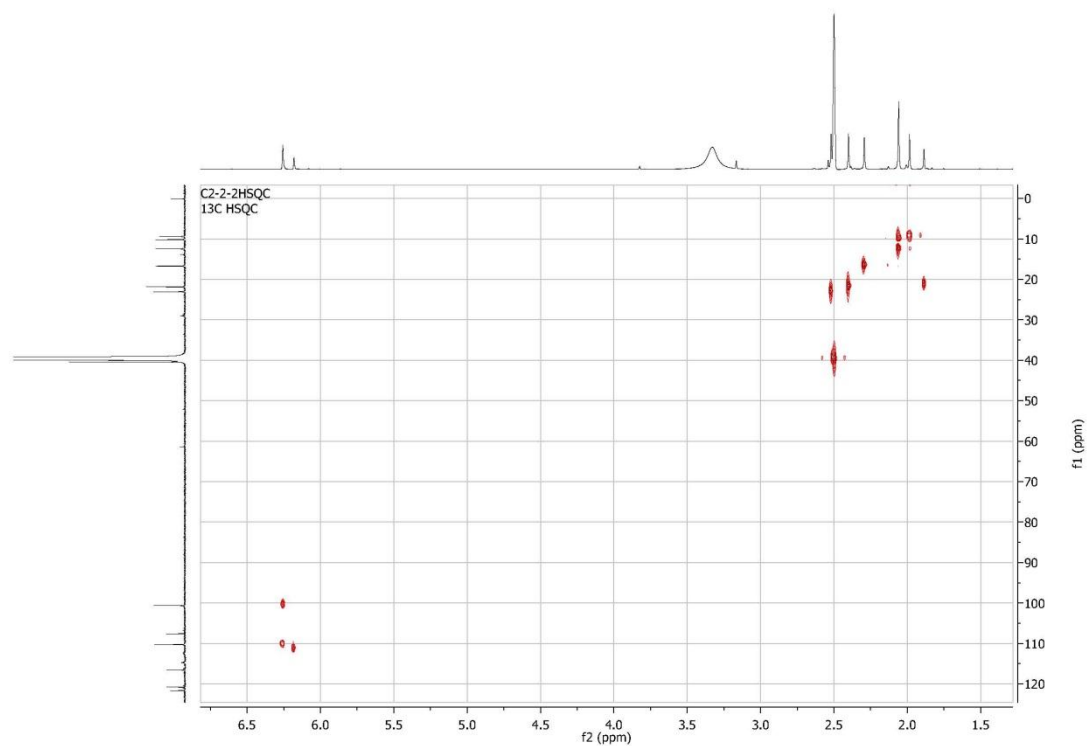

Figure S3 HMQC spectrum of **1** in DMSO-*d*<sub>6</sub>

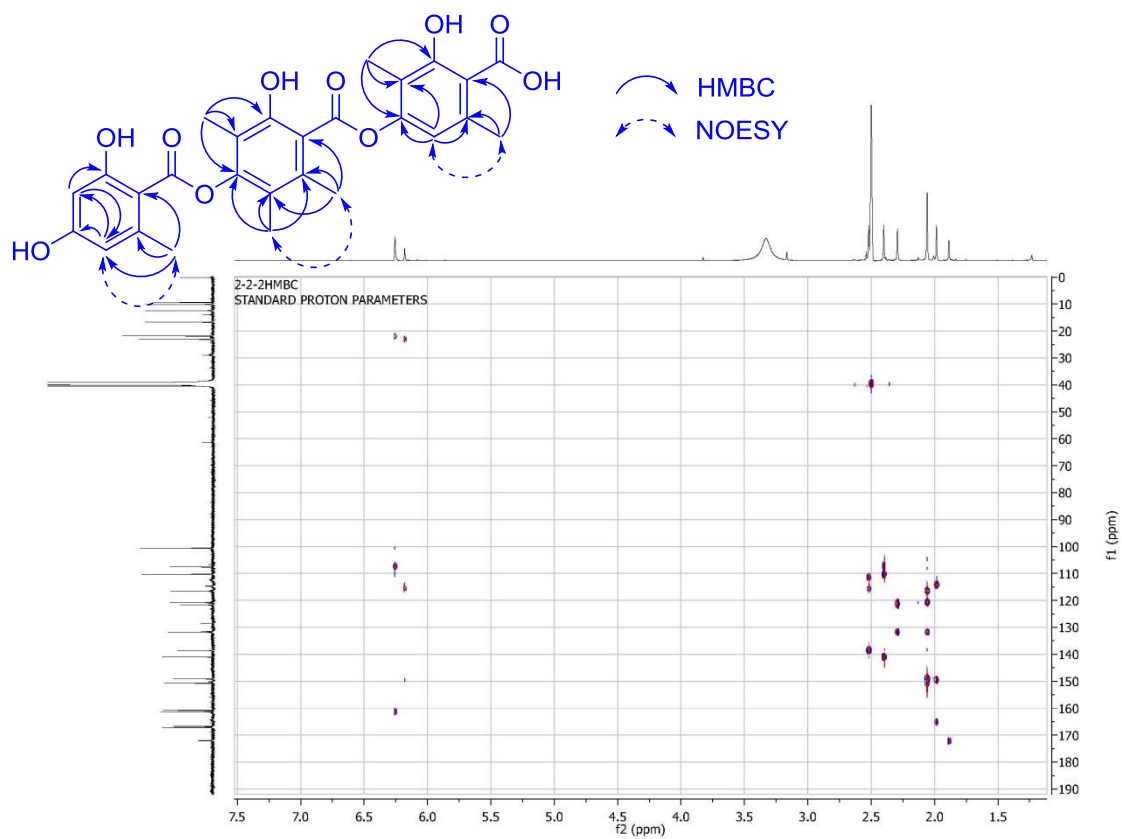

Figure S4 HMBC spectrum of **1** in DMSO-*d*<sub>6</sub>

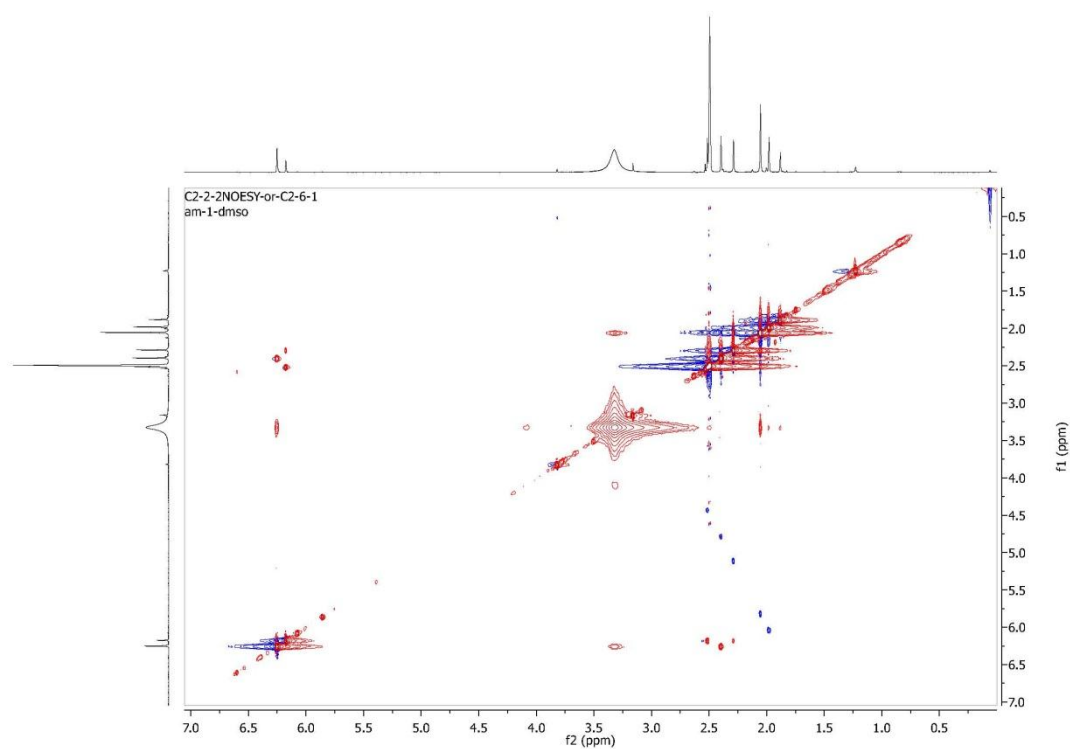

Figure S5 NOESY spectrum of **1** in DMSO-*d*<sub>6</sub>

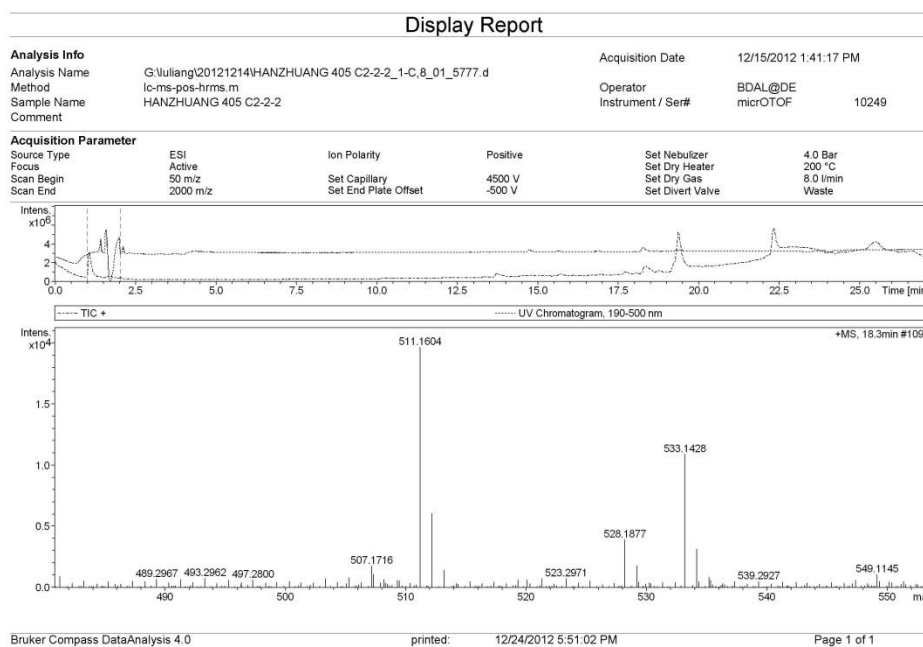

Figure S6 HRESIMS spectrum of **1**

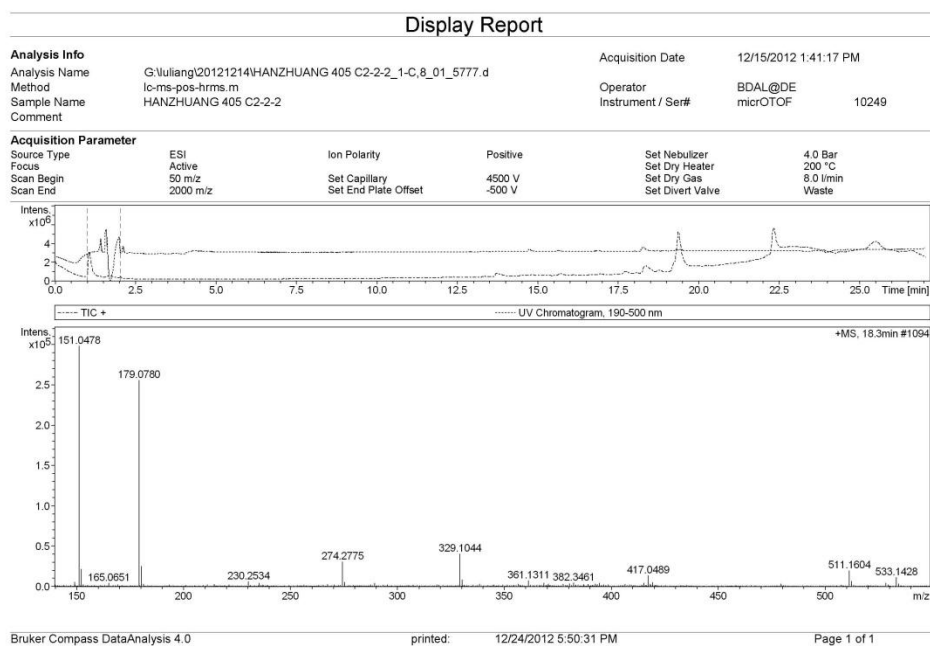

Figure S7 ISCID spectrum of **1**

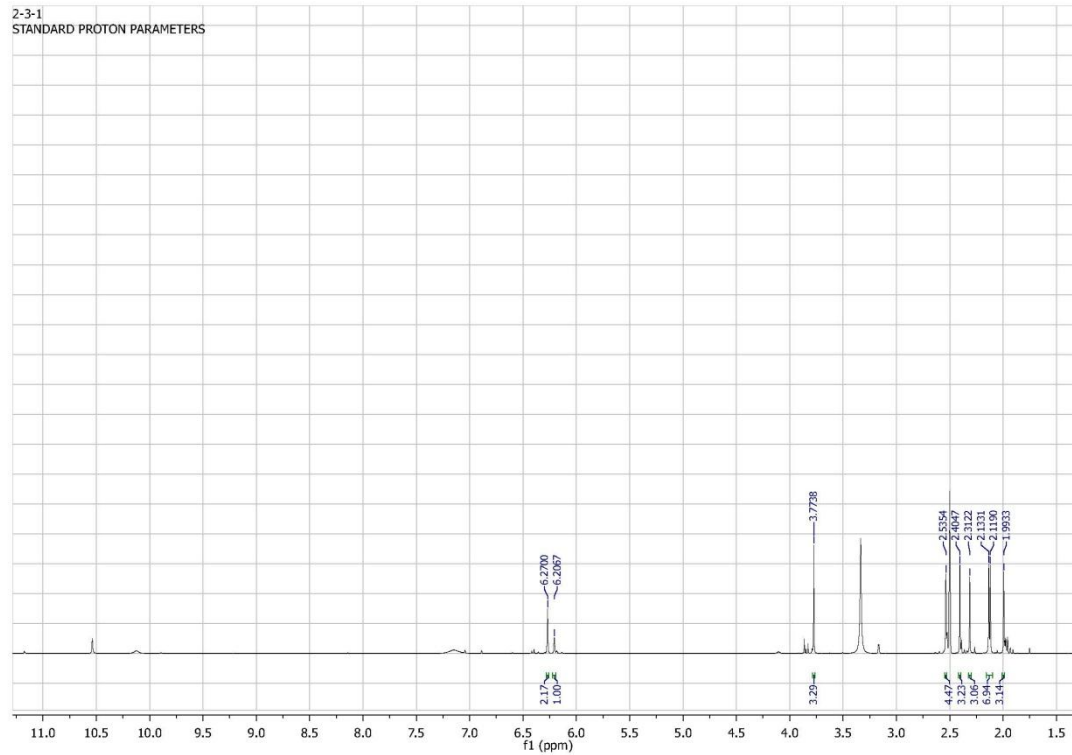

Figure S8 <sup>1</sup>H NMR spectrum of **2** in DMSO-*d*<sub>6</sub> (500 MHz)

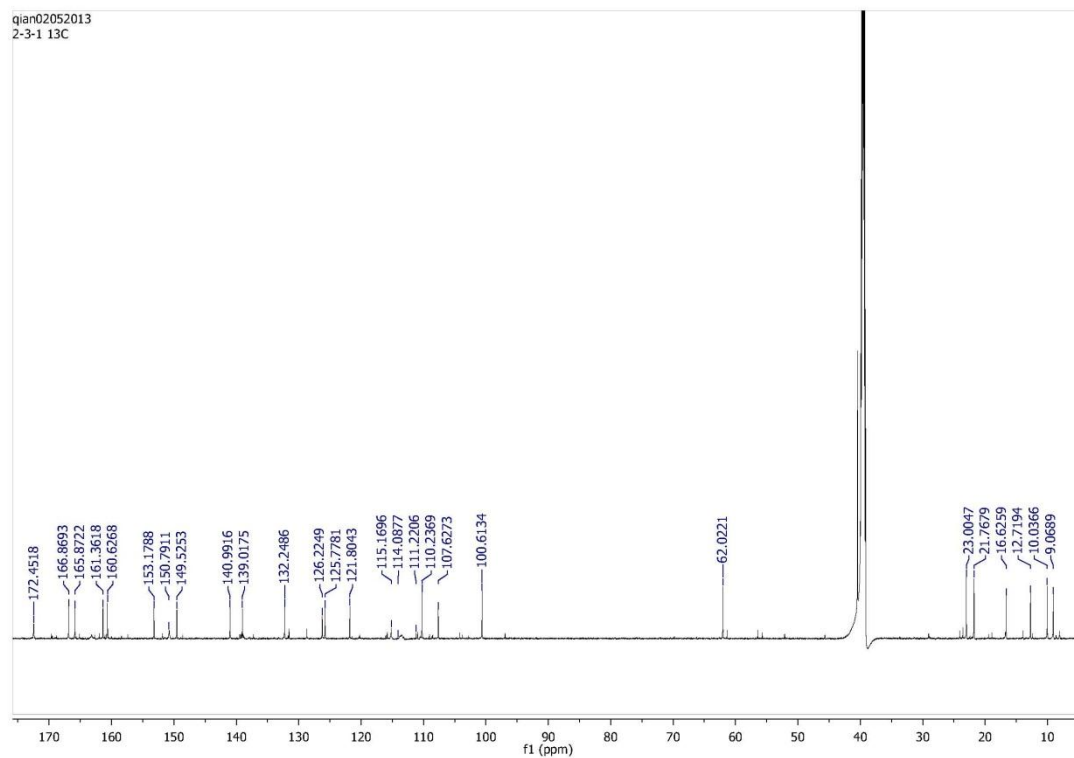

Figure S9  $^{13}\text{C}$  NMR spectrum of **2** in  $\text{DMSO-}d_6$  (125 MHz)

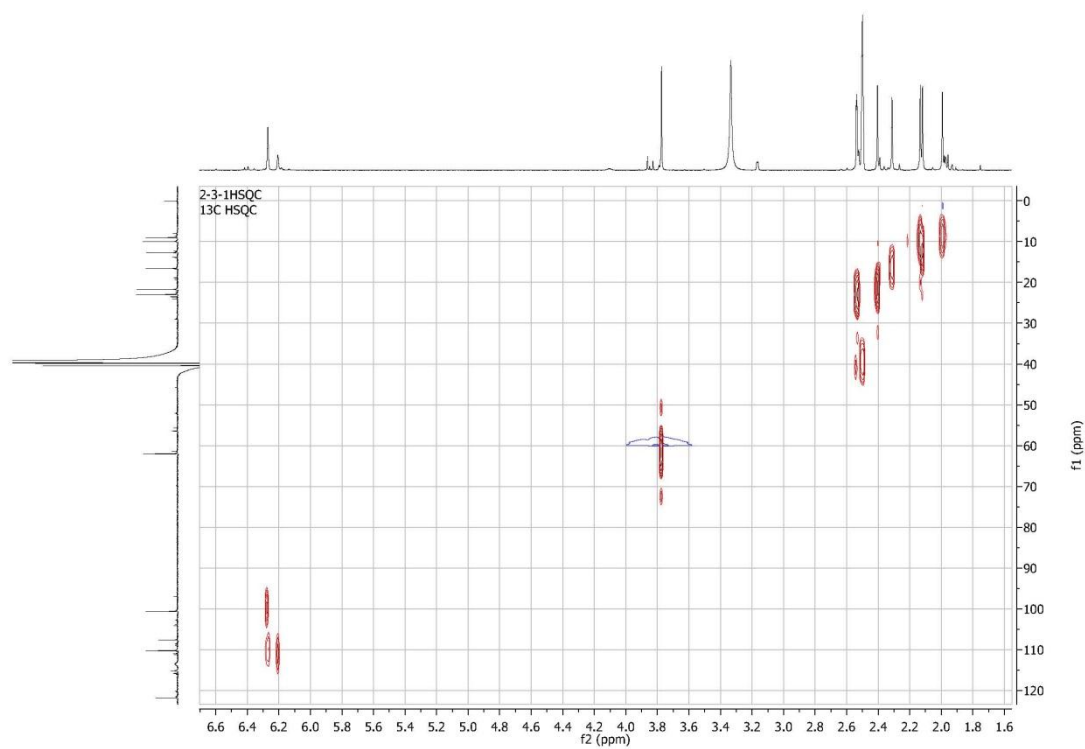

Figure S10 HMQC spectrum of **2** in  $\text{DMSO-}d_6$

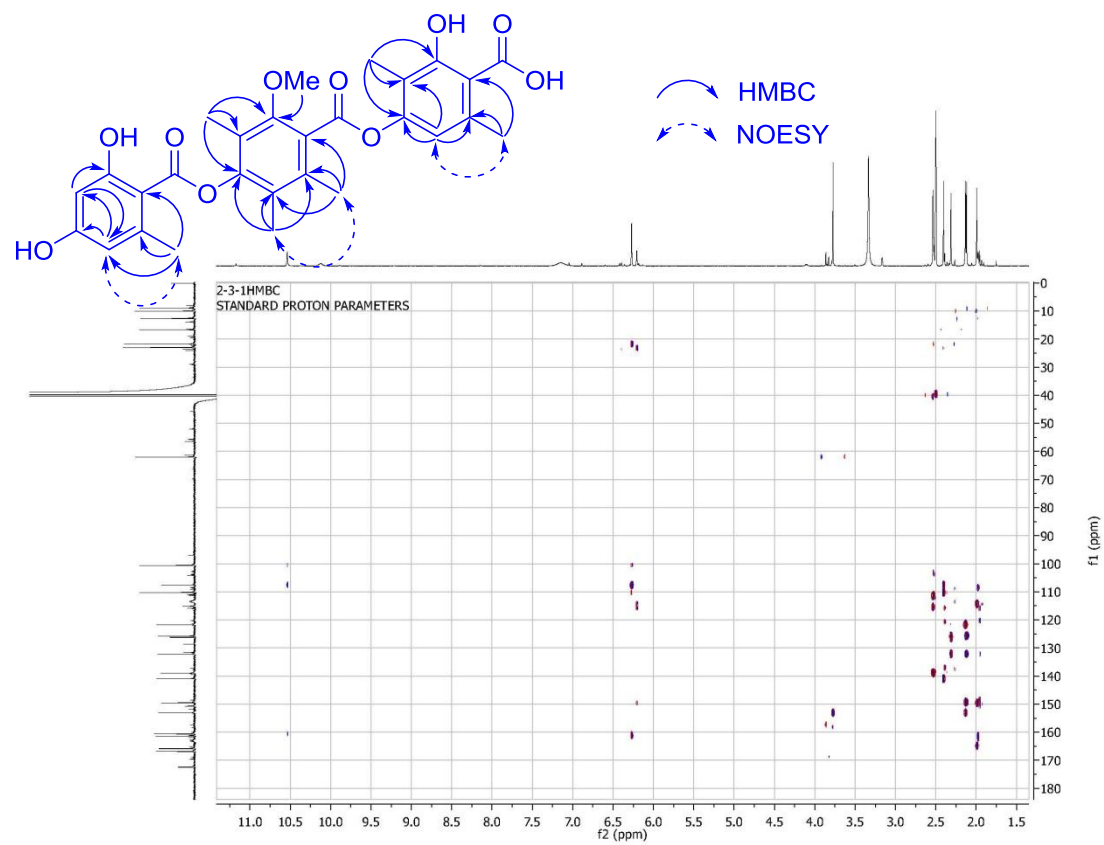

Figure S11 HMBC spectrum of **2** in DMSO-*d*<sub>6</sub>

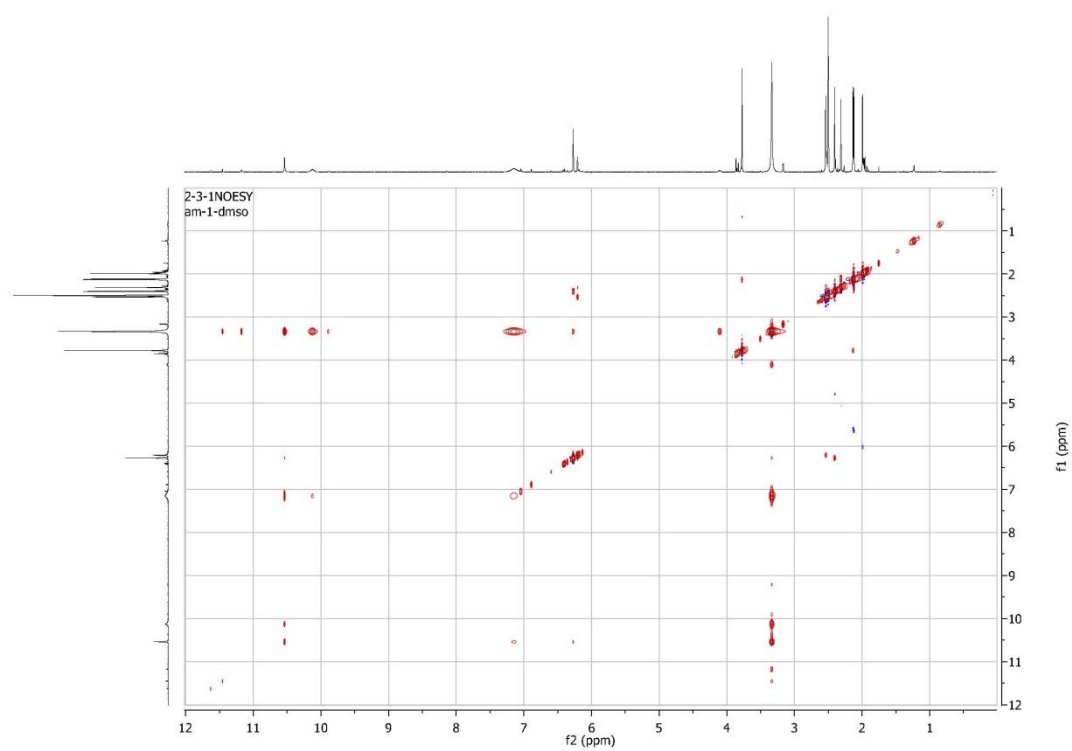

Figure S12 NOESY spectrum of **2** in DMSO-*d*<sub>6</sub>

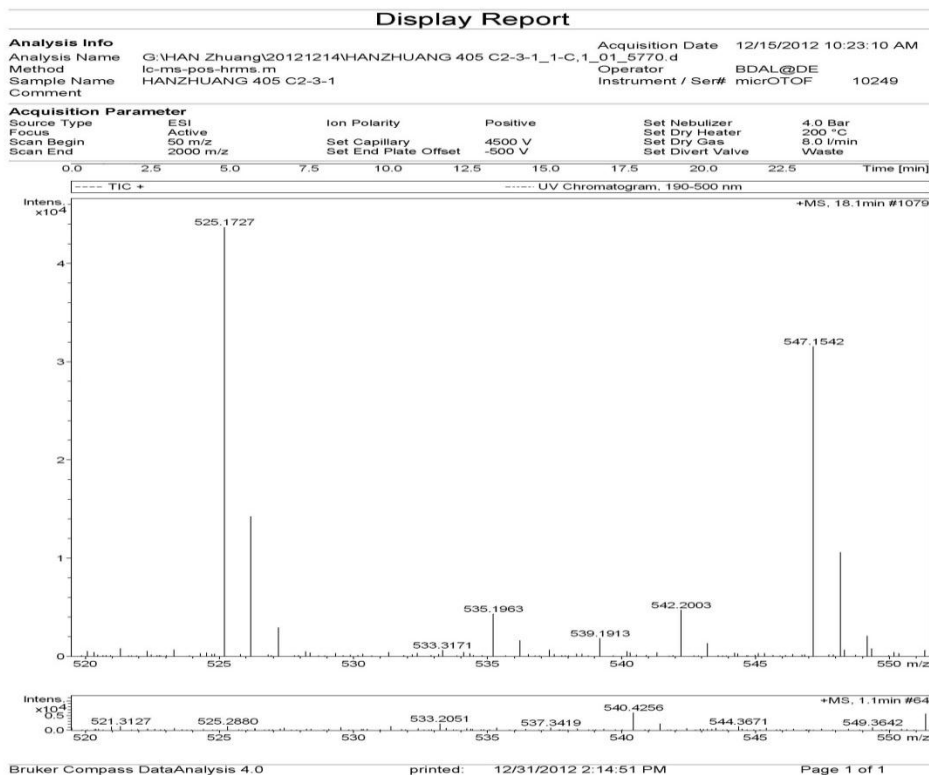

Figure S13 HRESIMS spectrum of **2**

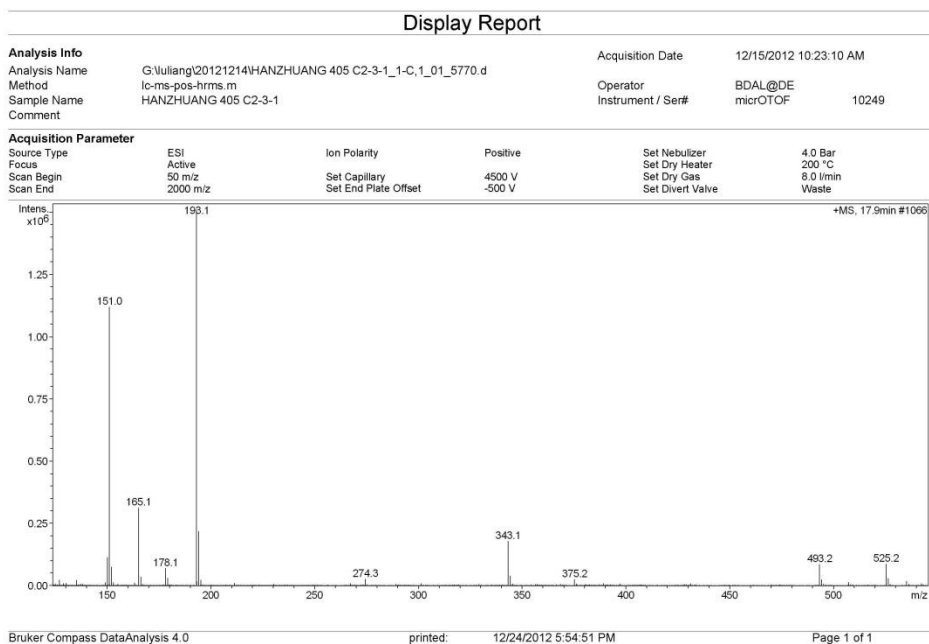

Figure S14 ISCID spectrum of **2**

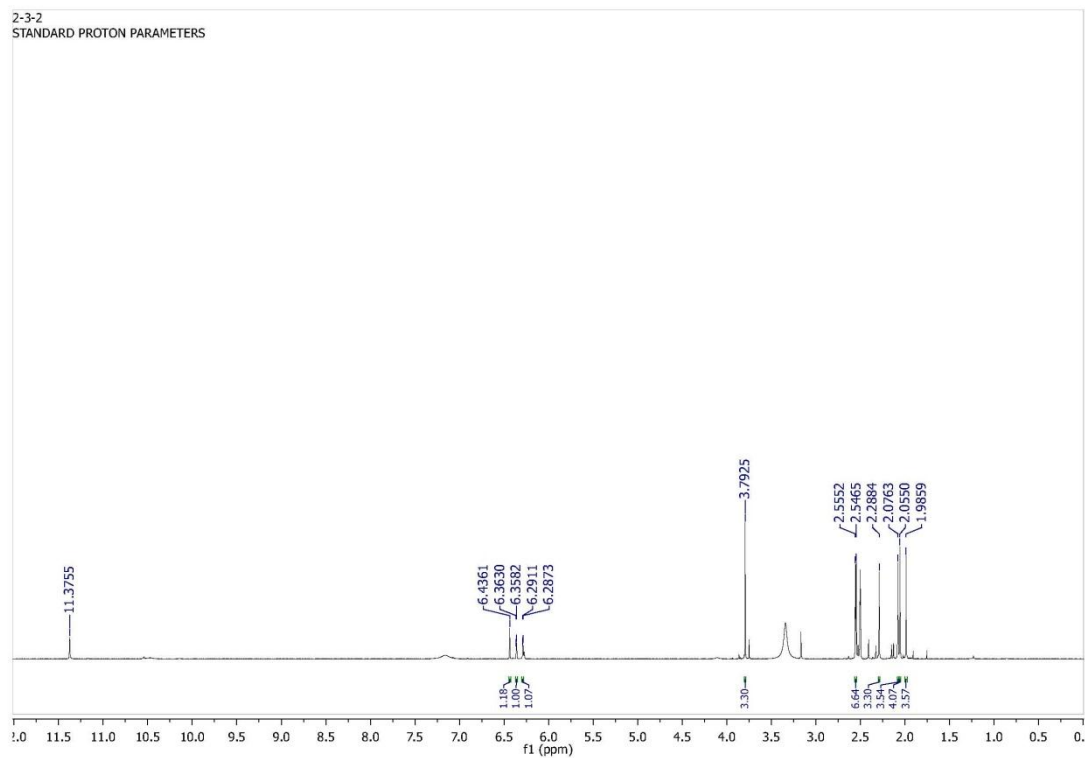

Figure S15  $^1\text{H}$  NMR spectrum of **3** in  $\text{DMSO-}d_6$  (500 MHz)

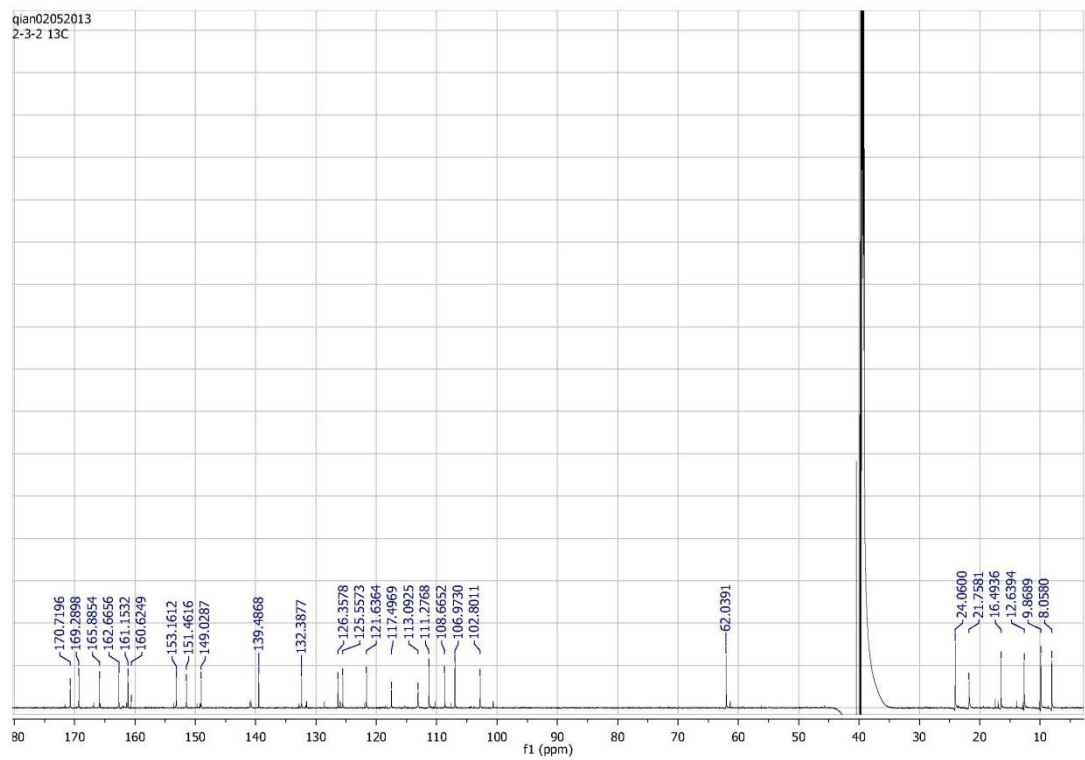

Figure S16  $^{13}\text{C}$  NMR spectrum of **3** in  $\text{DMSO-}d_6$  (125 MHz)

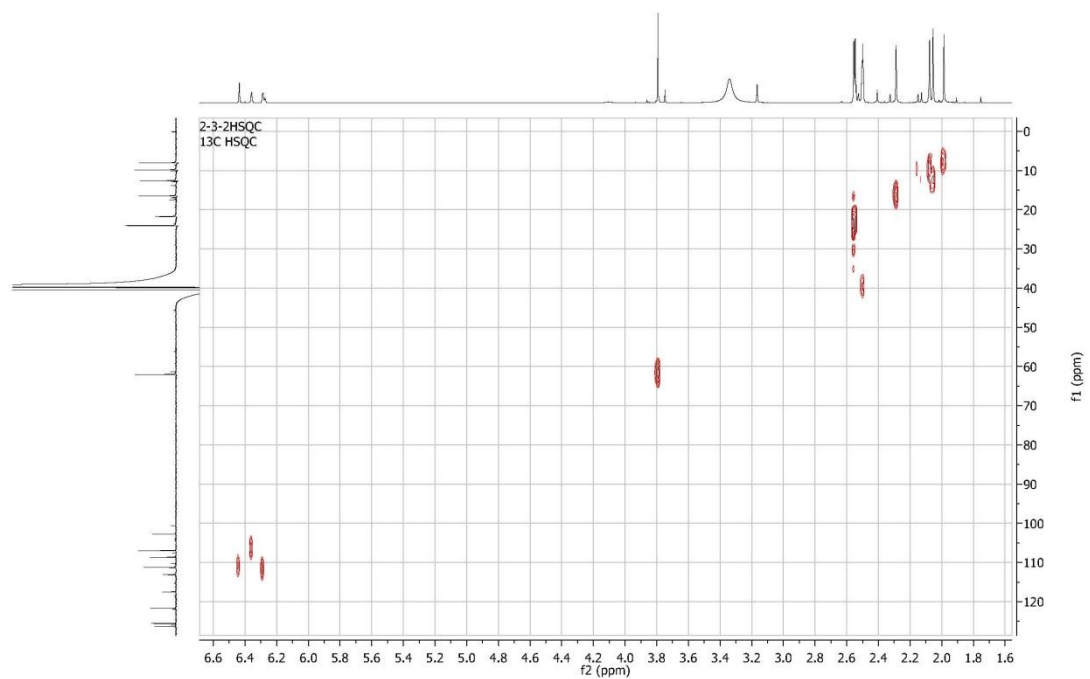

Figure S17 HMQC spectrum of **3** in DMSO-*d*<sub>6</sub>

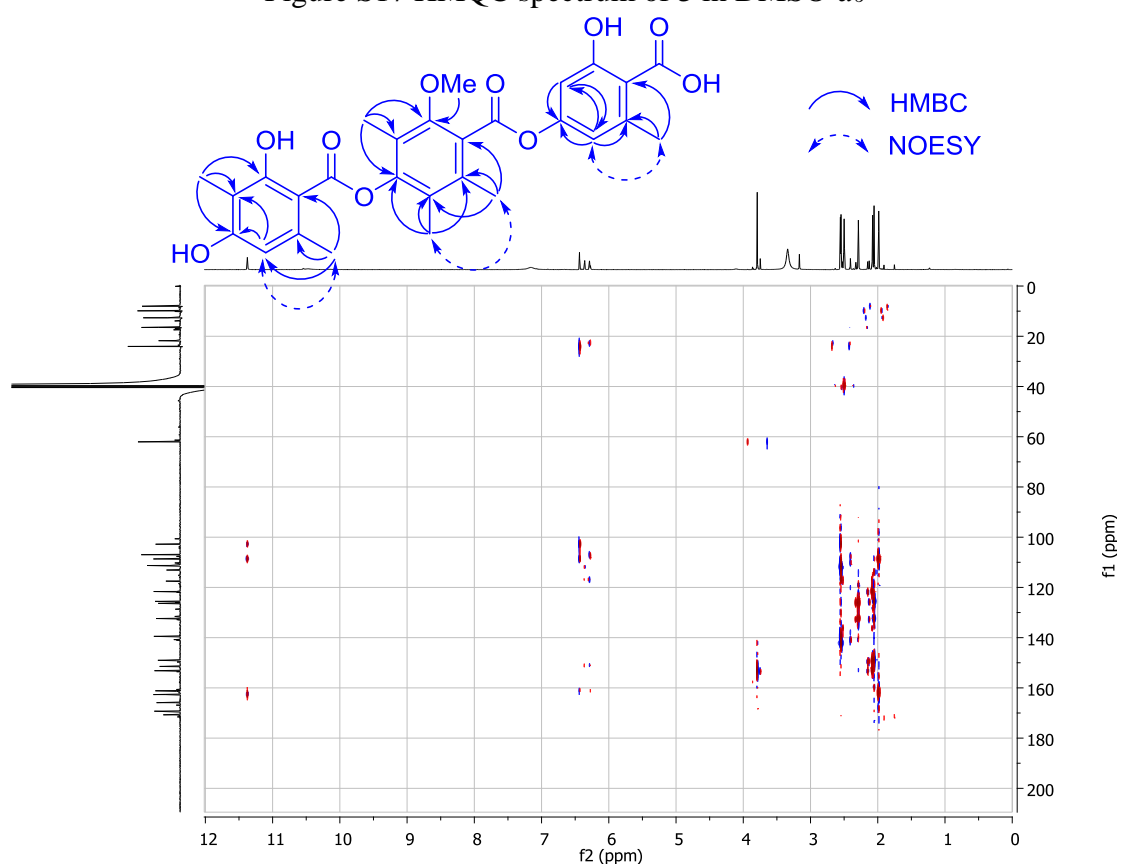

Figure S18 HMBC spectrum of **3** in DMSO-*d*<sub>6</sub>



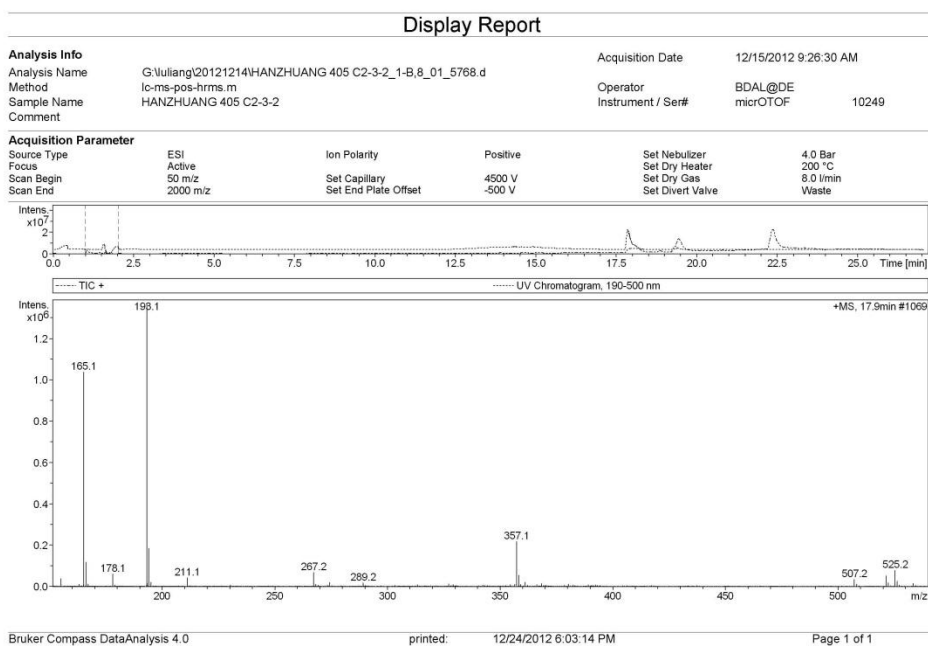

Figure S21 ISCID spectrum of **3**

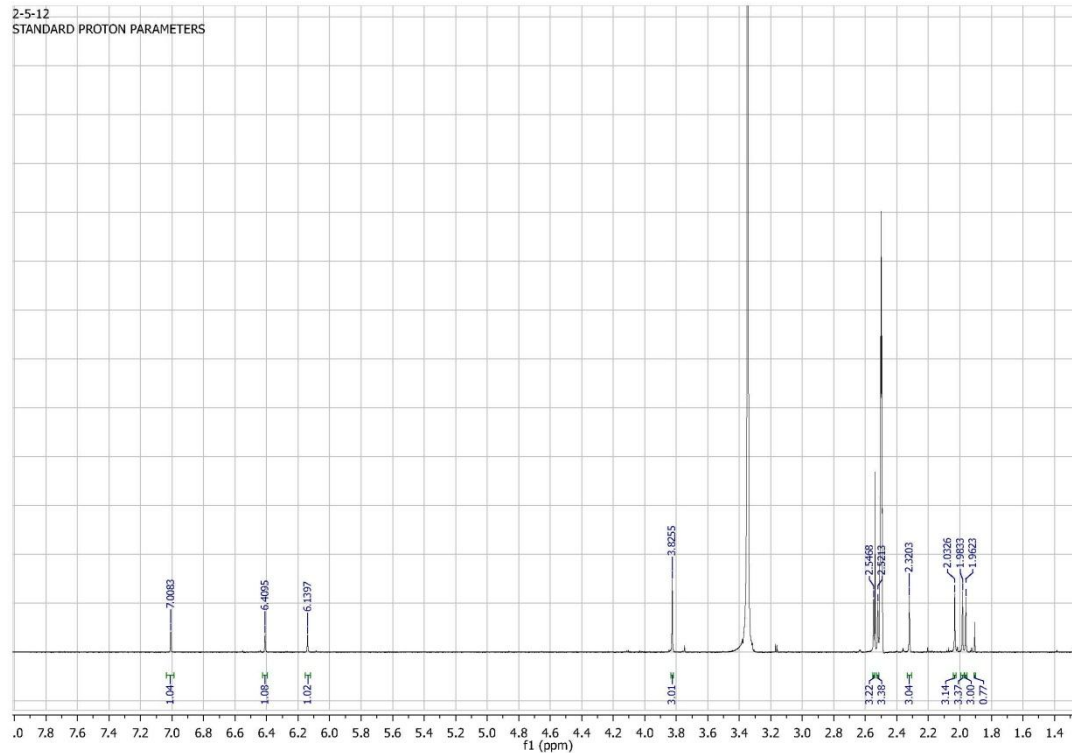

Figure S22  $^1\text{H}$  NMR spectrum of **4** in  $\text{DMSO-}d_6$  (500 MHz)

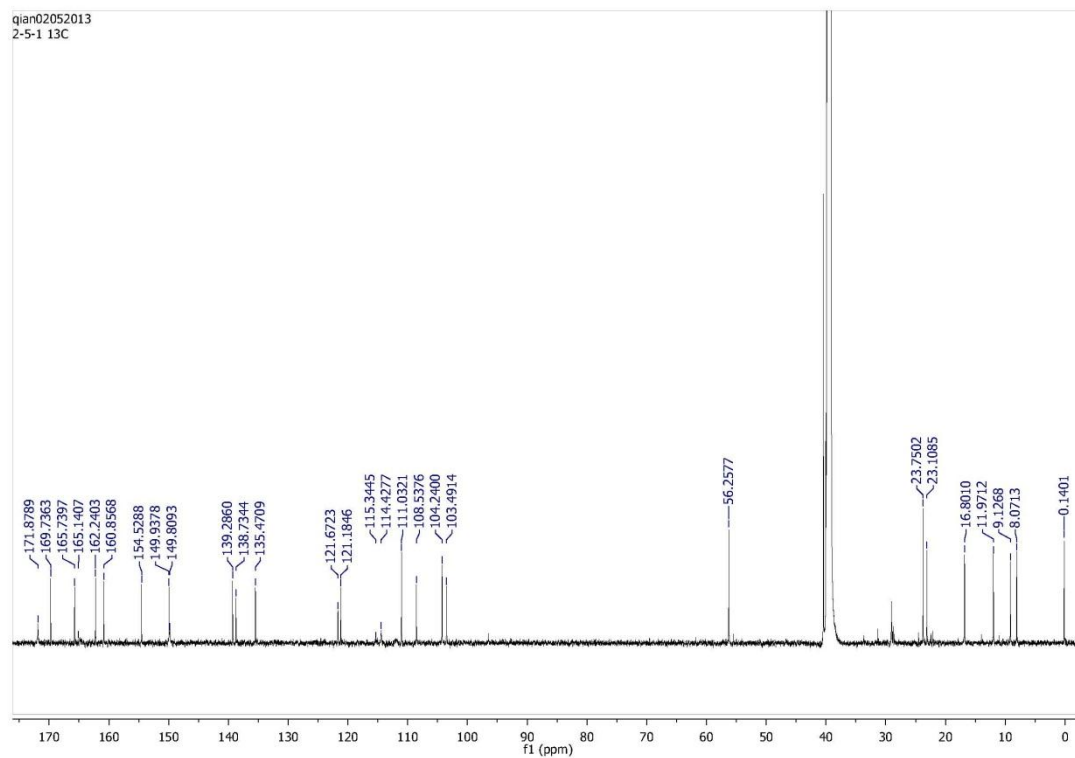

Figure S23  $^{13}\text{C}$  NMR spectrum of **4** in  $\text{DMSO-}d_6$  (125 MHz)

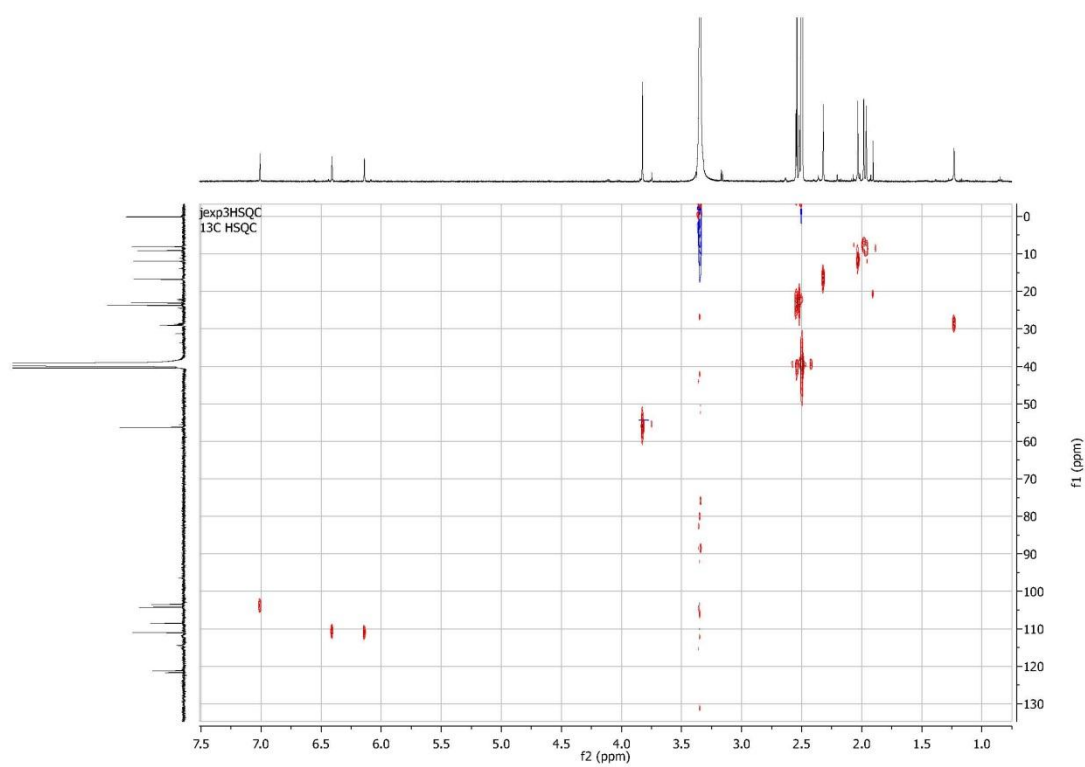

Figure S24 HSQC spectrum of **4** in  $\text{DMSO-}d_6$

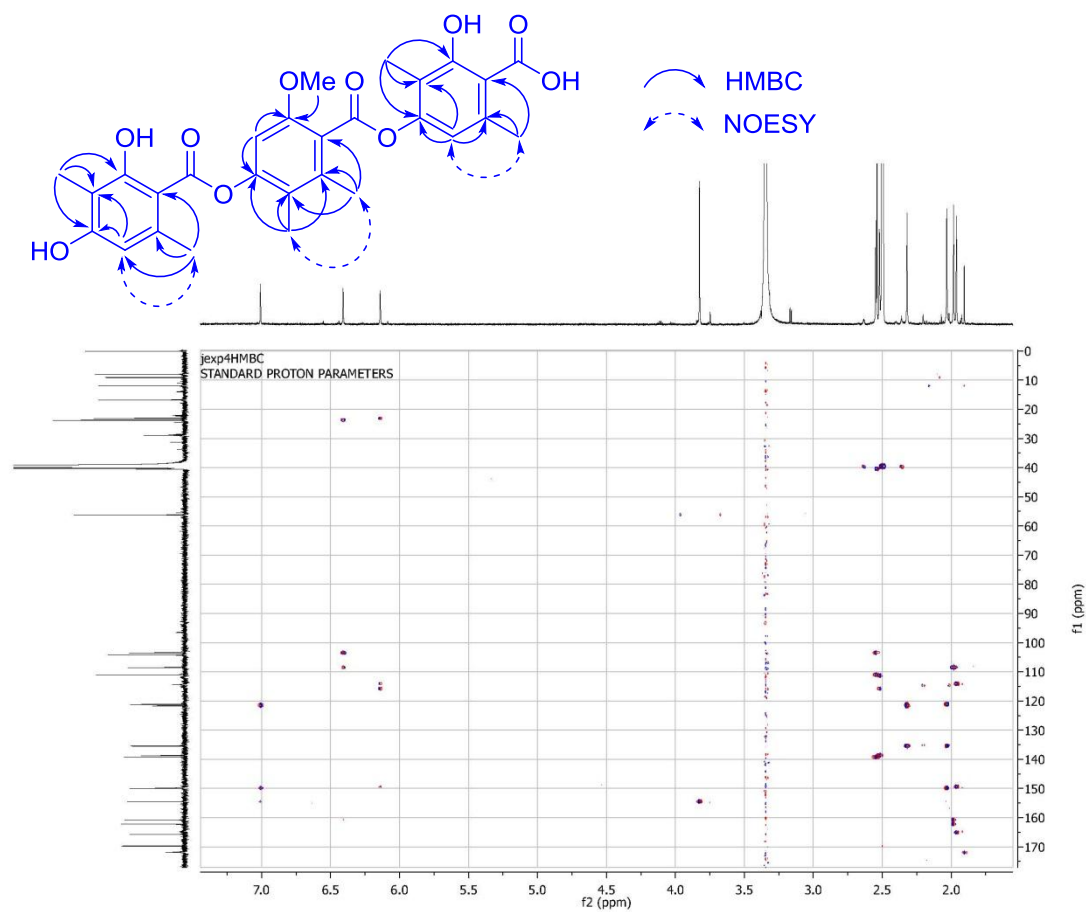

Figure S25 HMBC spectrum of **4** in DMSO-*d*<sub>6</sub>

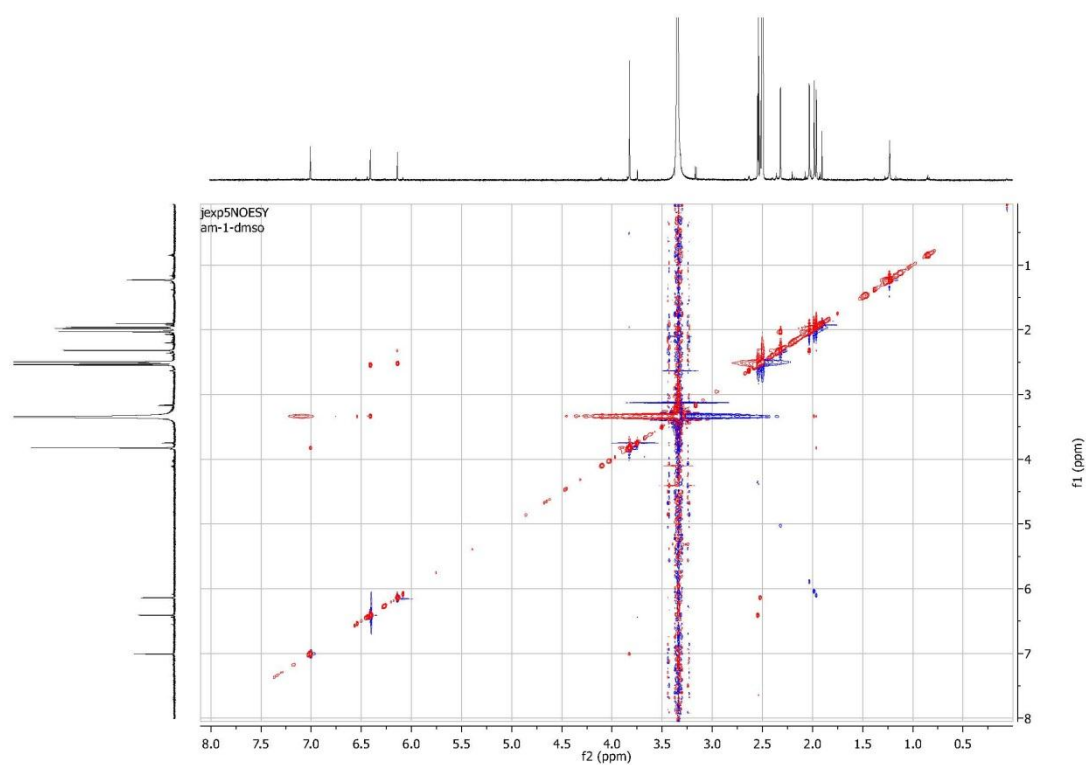

Figure S26 NOESY spectrum of **4** in DMSO-*d*<sub>6</sub>

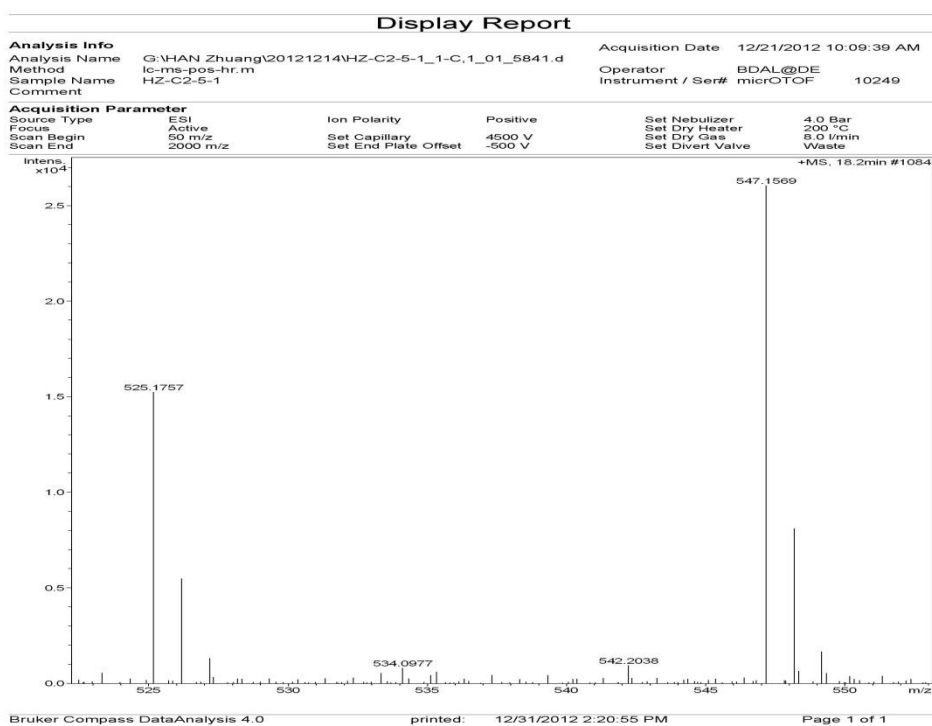

Figure S27 HRESIMS spectrum of **4**

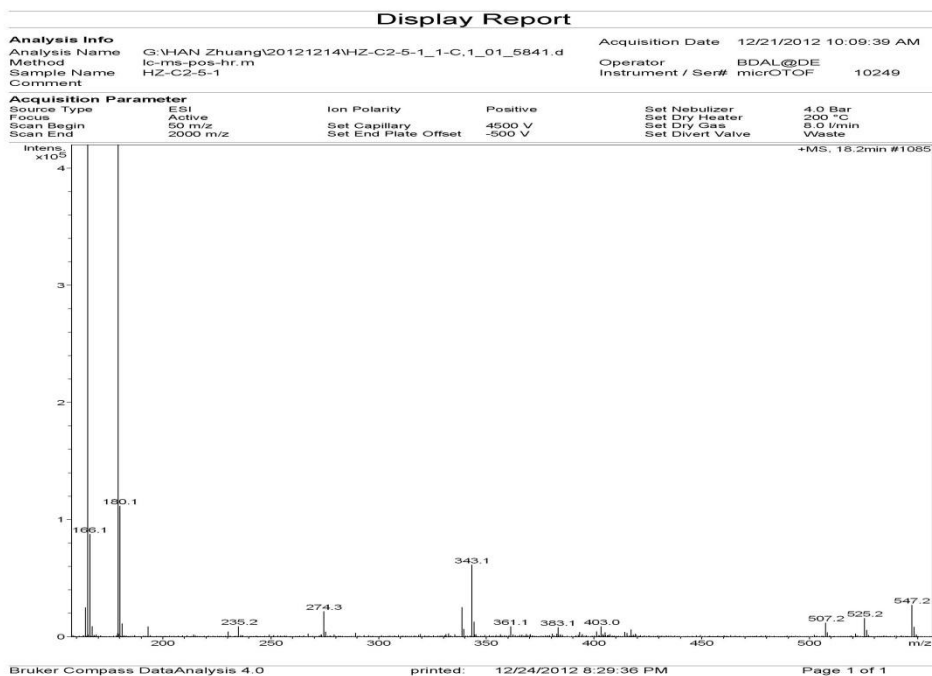

Figure S28 ISCID spectrum of **4**

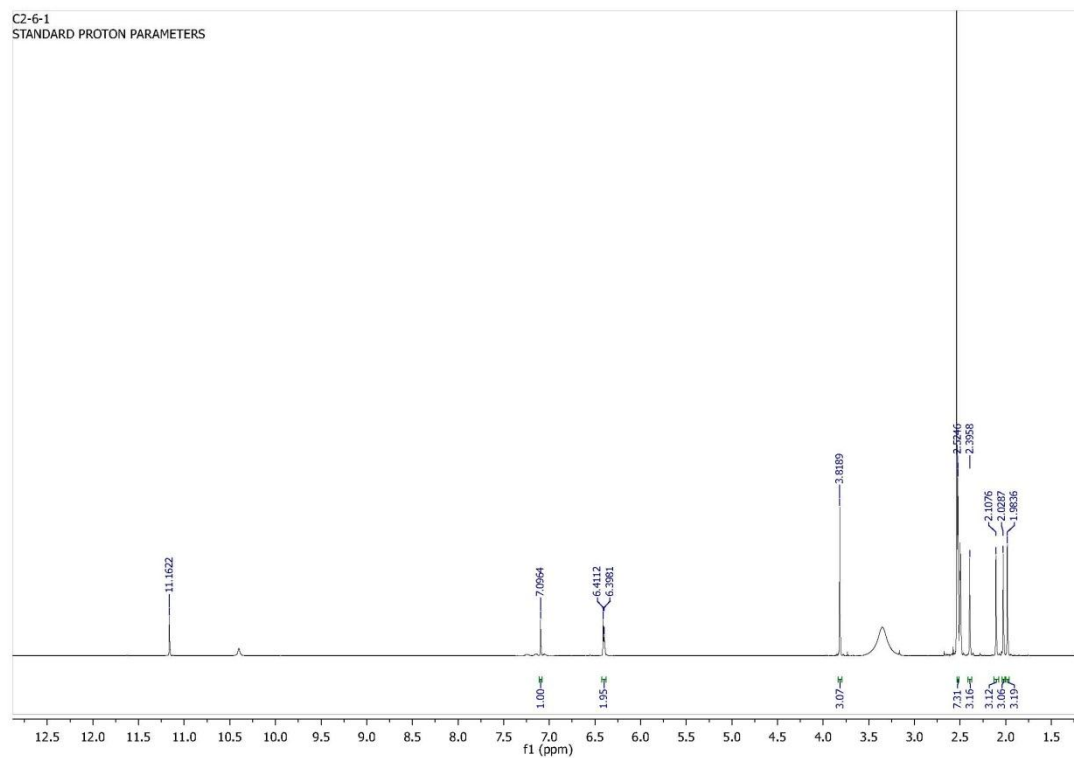

Figure S29  $^1\text{H}$  NMR spectrum of **5** in  $\text{DMSO-}d_6$  (500 MHz)

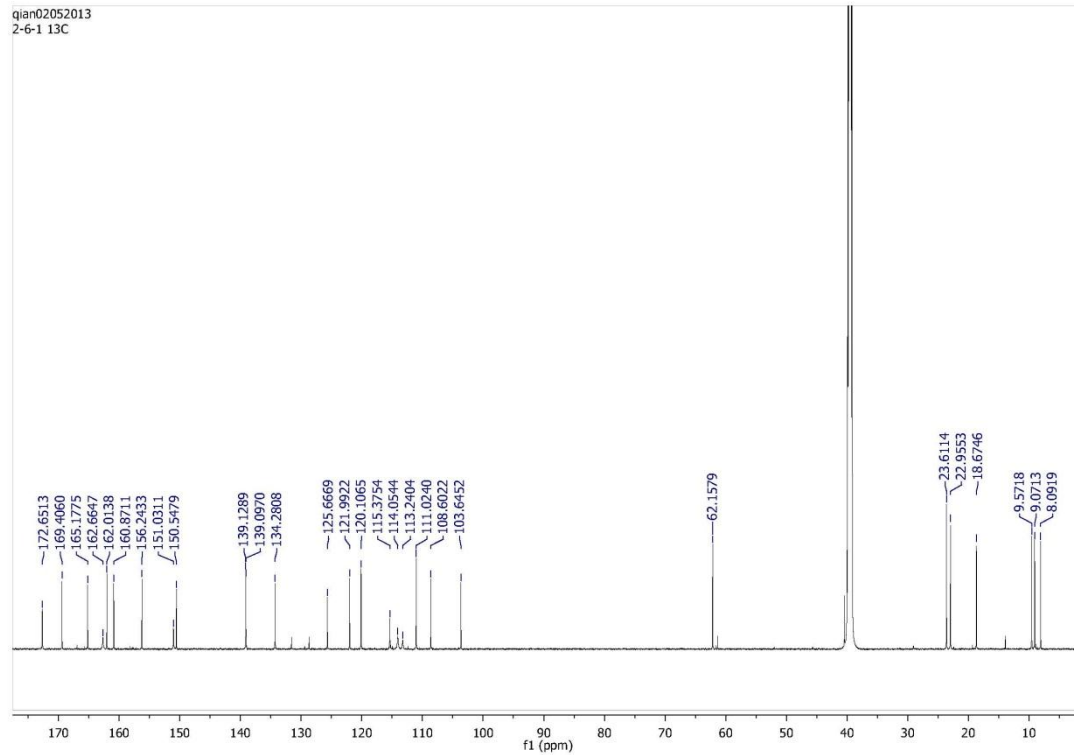

Figure S30  $^{13}\text{C}$  NMR spectrum of **5** in  $\text{DMSO-}d_6$  (125 MHz)

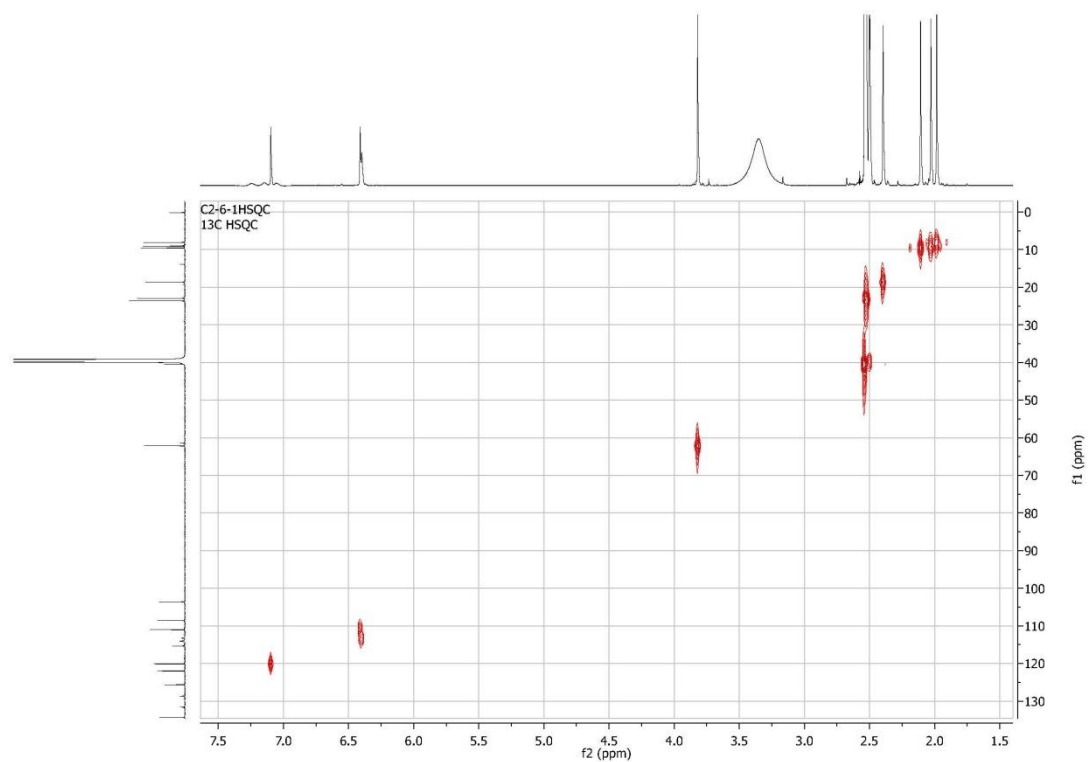

Figure S31 HMQC spectrum of **5** in DMSO- $d_6$

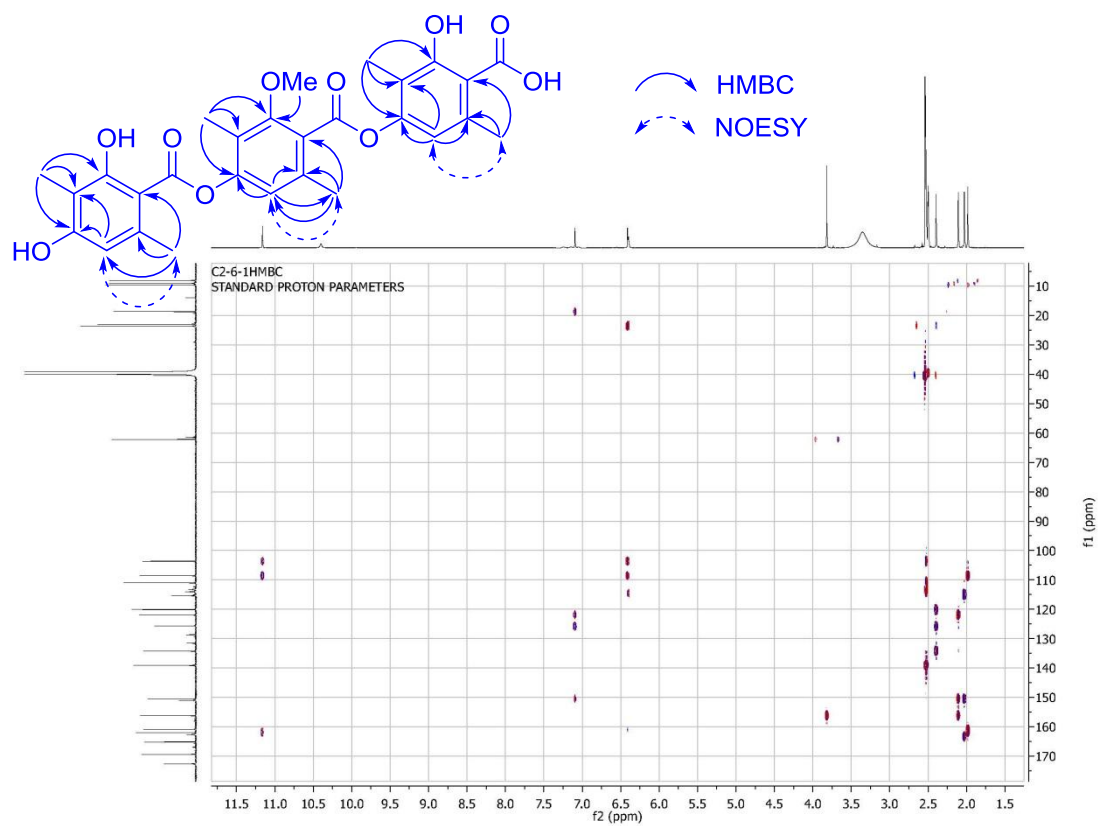

Figure S32 HMBC spectrum of **5** in DMSO- $d_6$

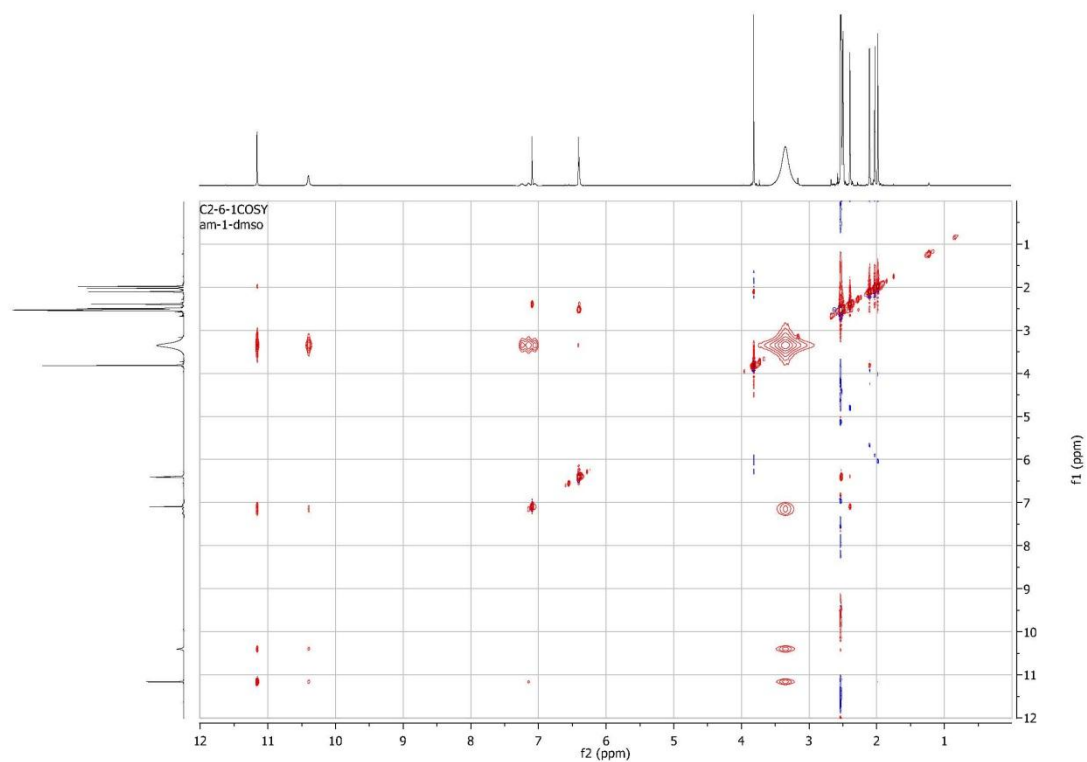

Figure S33 NOESY spectrum of **5** in DMSO-*d*<sub>6</sub>

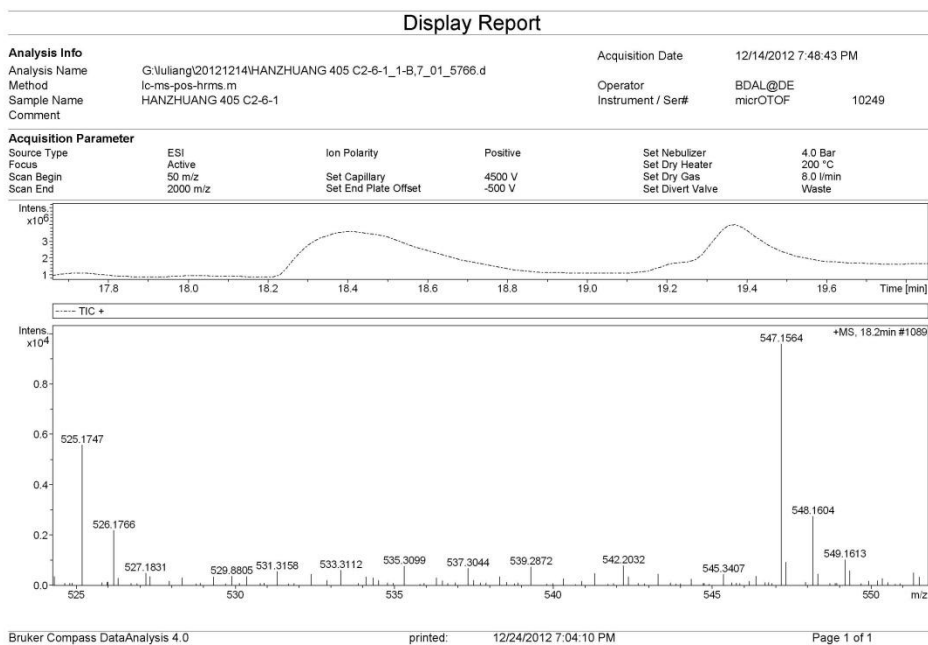

Figure S34 HRESIMS spectrum of **5**

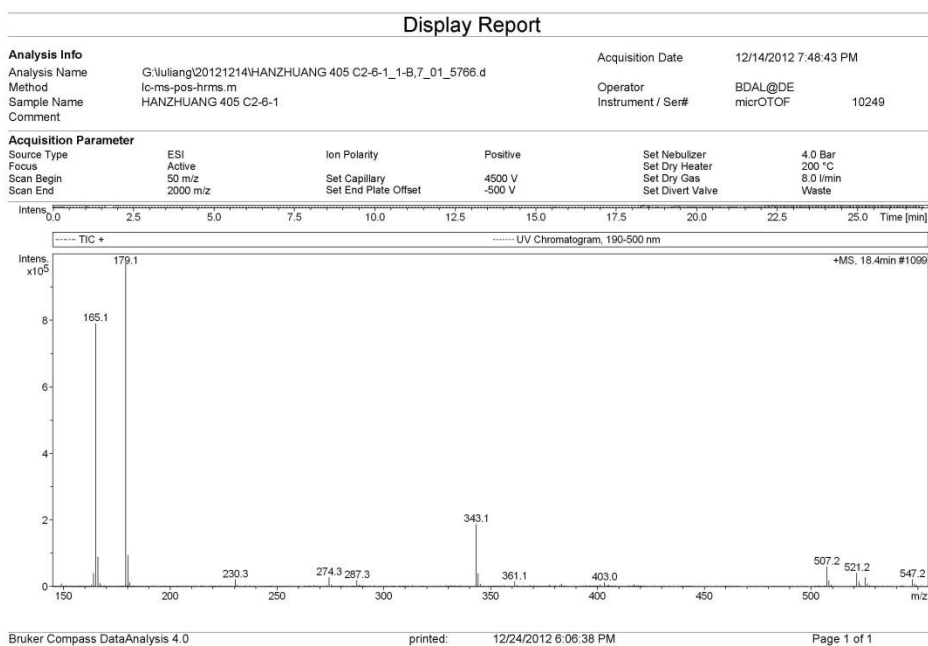

Figure S35 ISCID spectrum of **5**

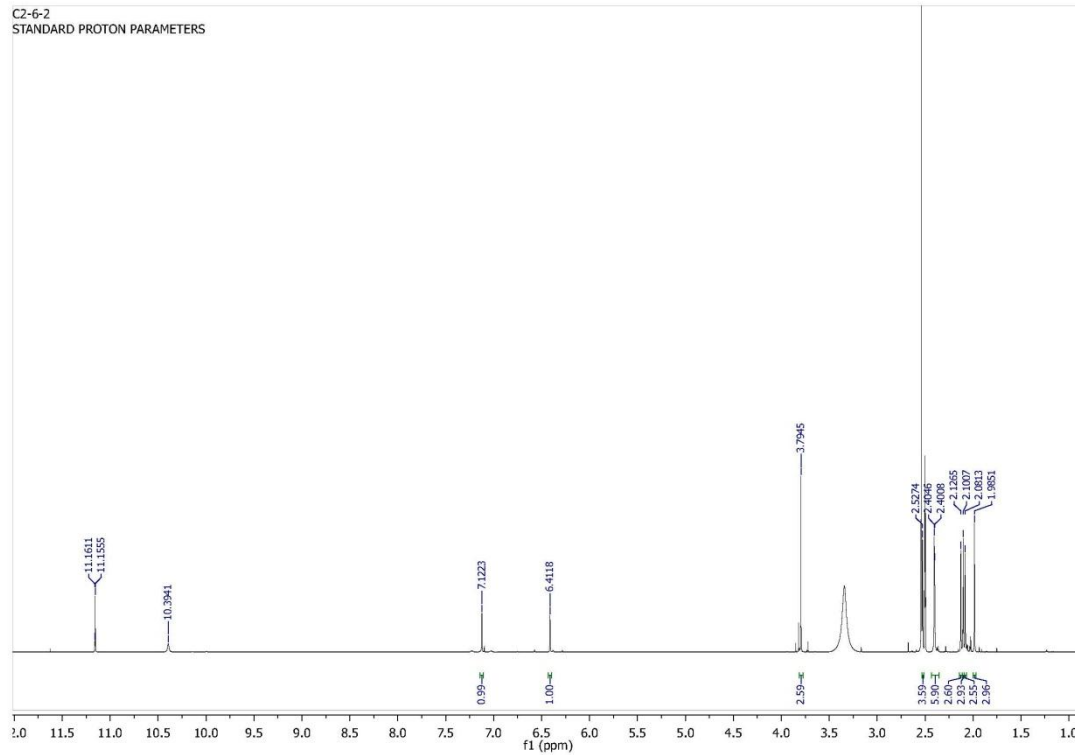

Figure S36  $^1\text{H}$  NMR spectrum of **6** in  $\text{DMSO-}d_6$  (500 MHz)

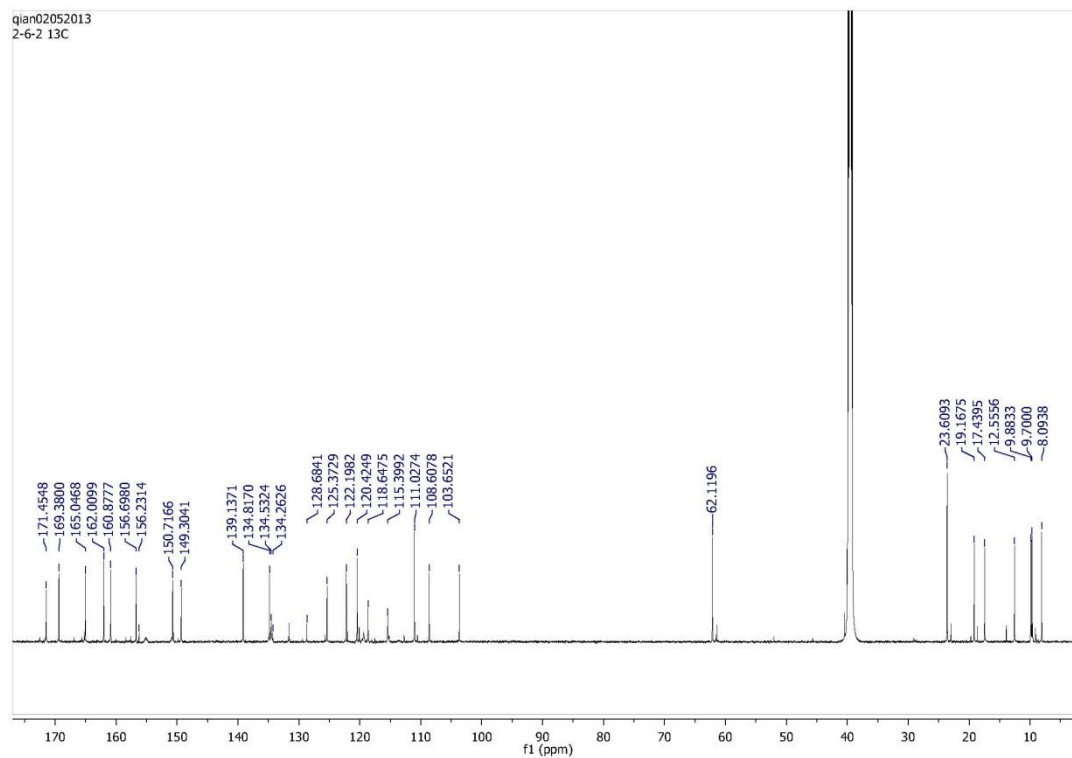

Figure S37  $^{13}\text{C}$  NMR spectrum of **6** in  $\text{DMSO-}d_6$  (125 MHz)

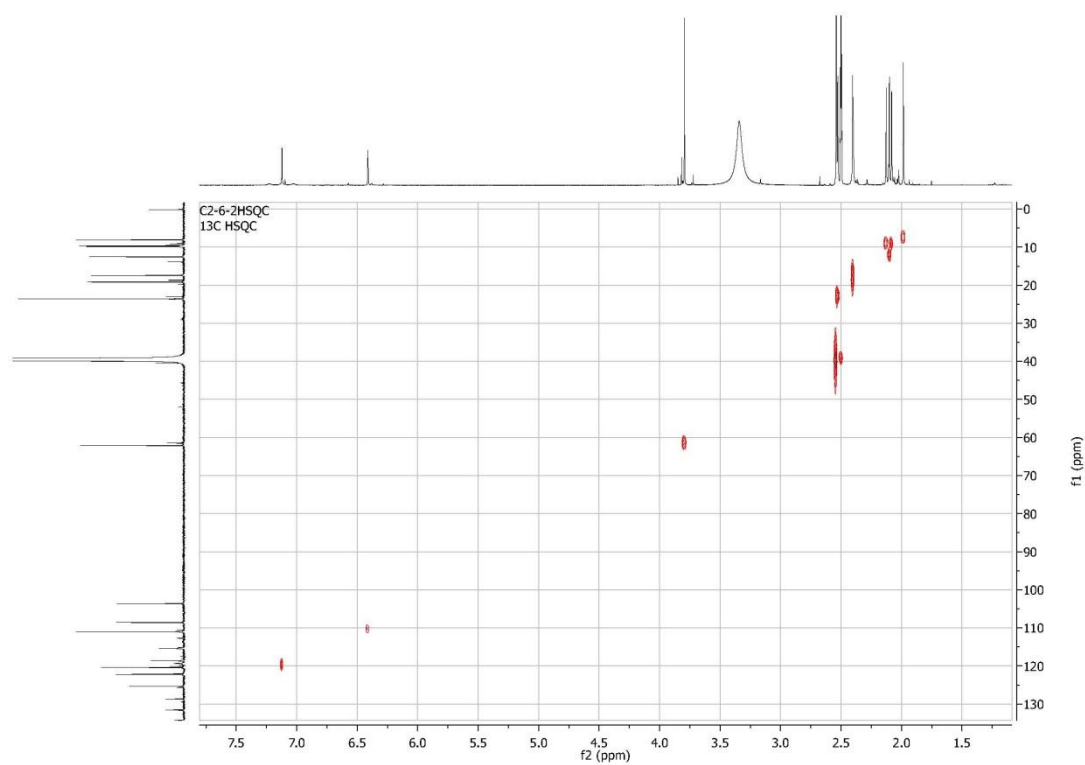

Figure S38 HMQC spectrum of **6** in  $\text{DMSO-}d_6$

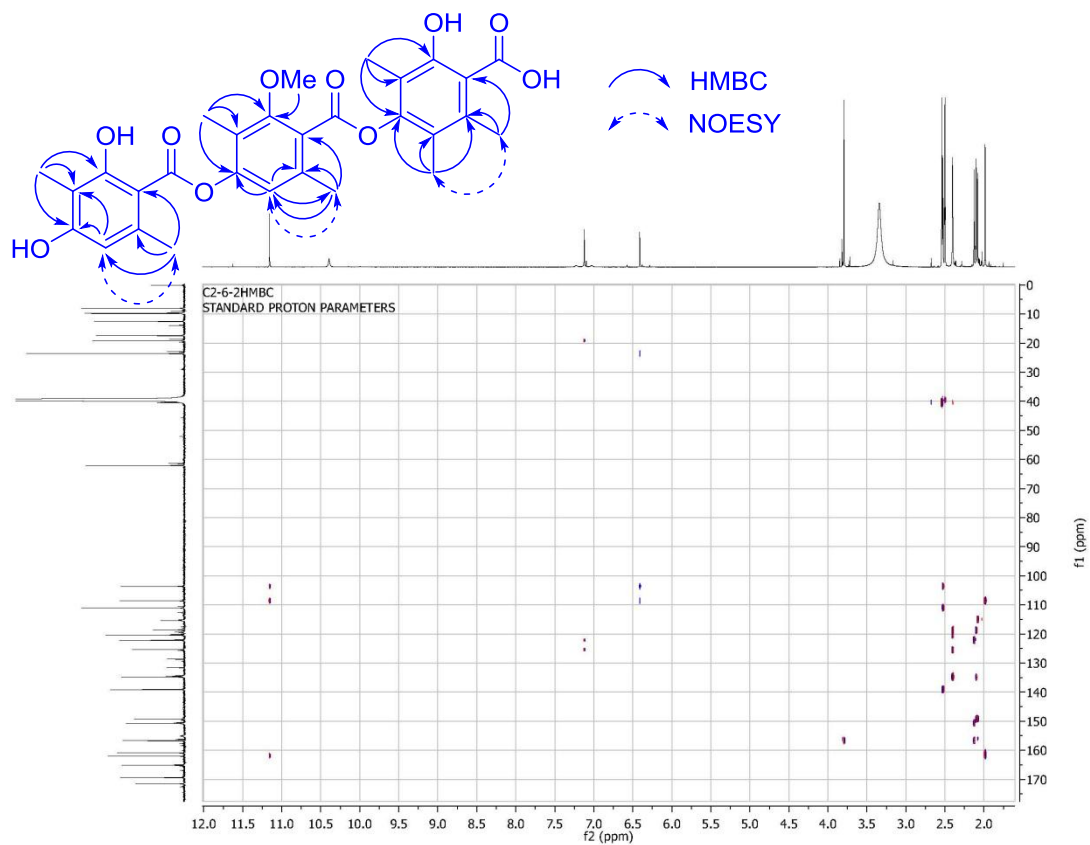

Figure S39 HMBC spectrum of **6** in  $\text{DMSO-}d_6$

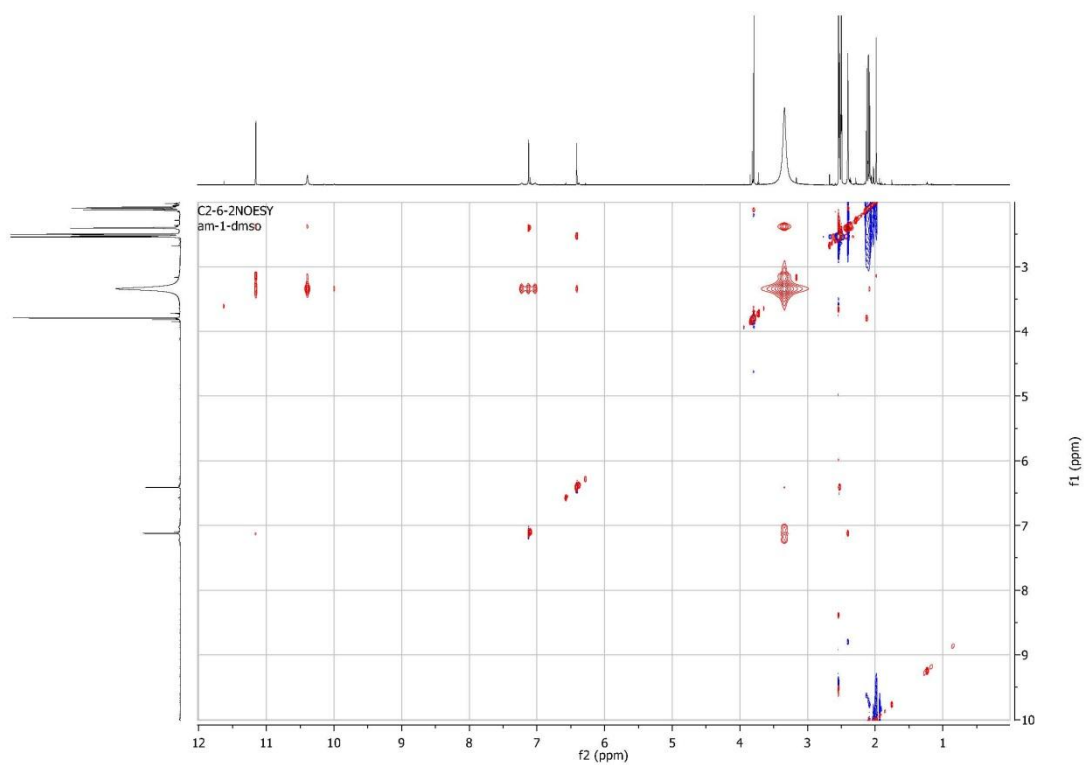

Figure S40 NOESY spectrum of **6** in  $\text{DMSO-}d_6$

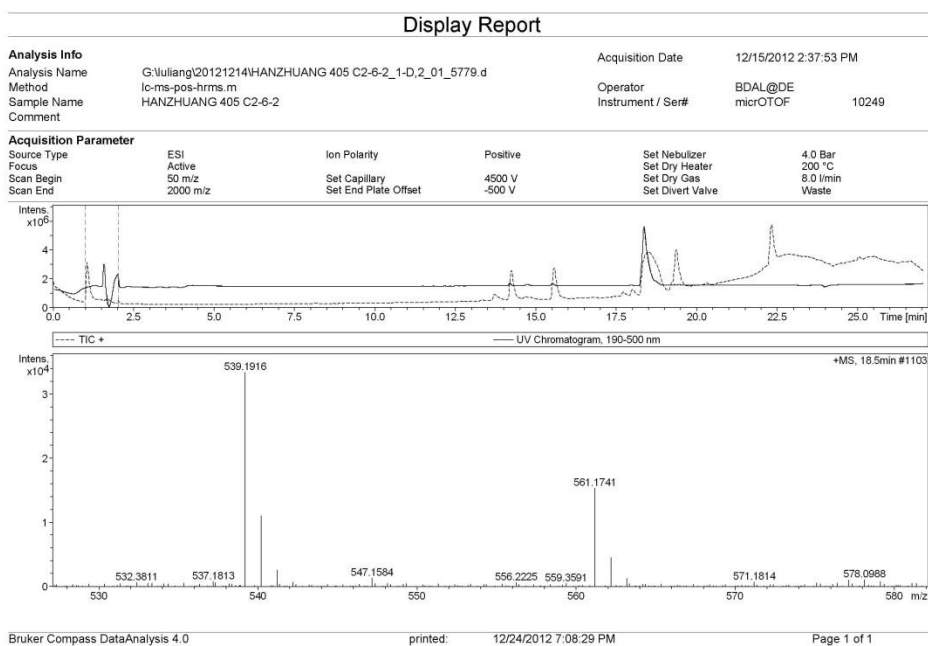

Figure S41 HRESIMS spectrum of **6**

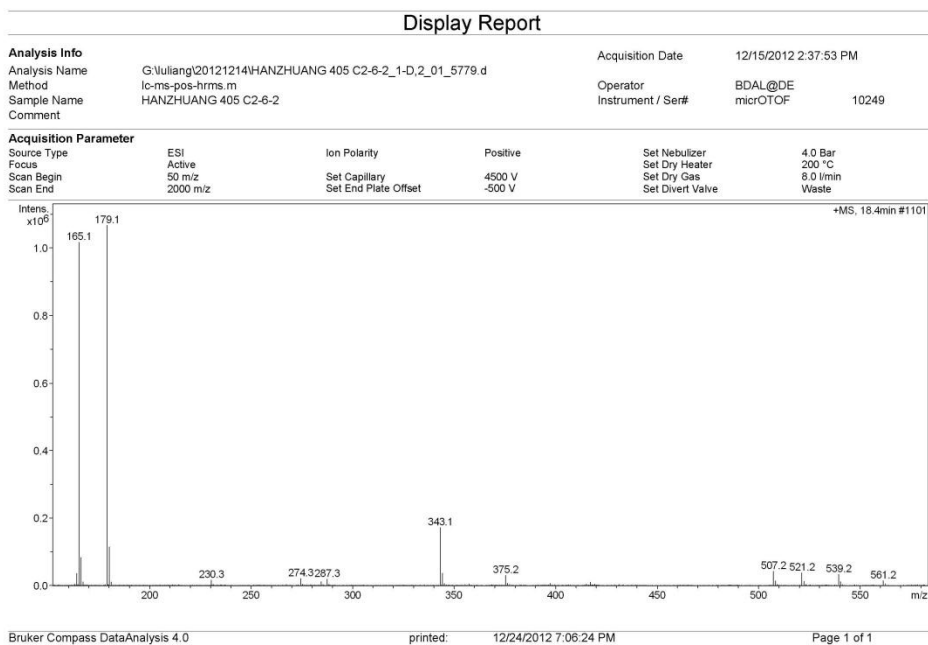

Figure S42 ISCID spectrum of **6**

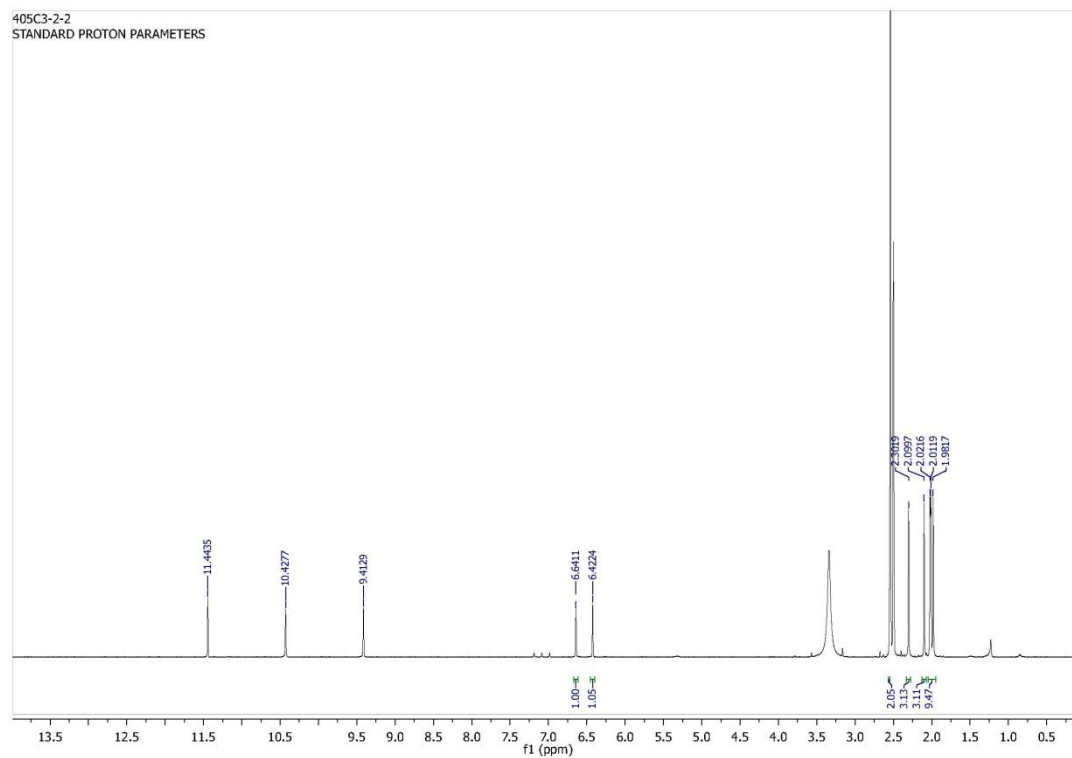

Figure S43  $^1\text{H}$  NMR spectrum of **7** in  $\text{DMSO}-d_6$  (500 MHz)

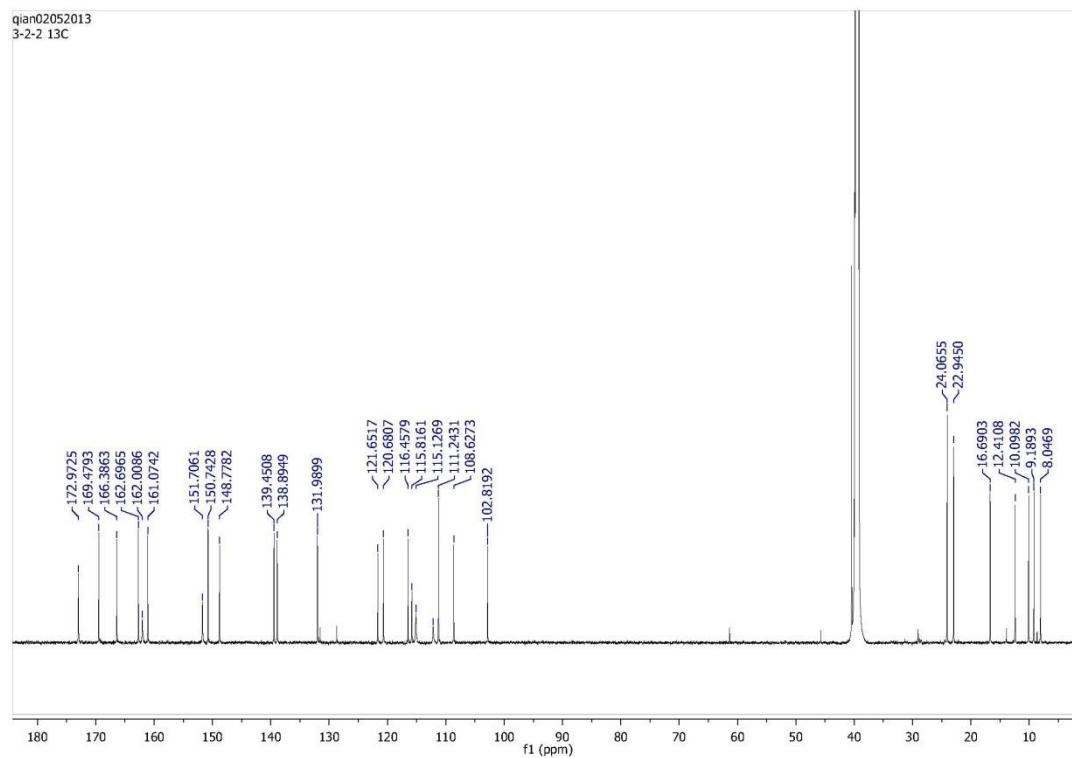

Figure S44  $^{13}\text{C}$  NMR spectrum of **7** in  $\text{DMSO}-d_6$  (125 MHz)

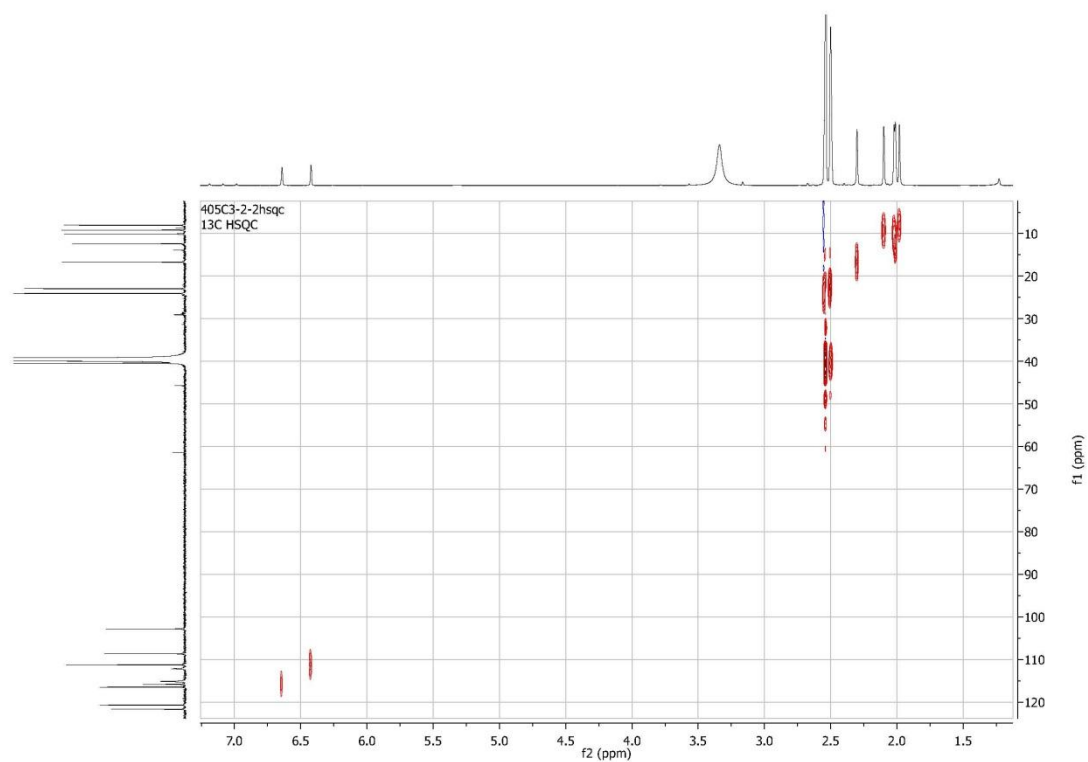

Figure S45 HMQC spectrum of **7** in DMSO-*d*<sub>6</sub>

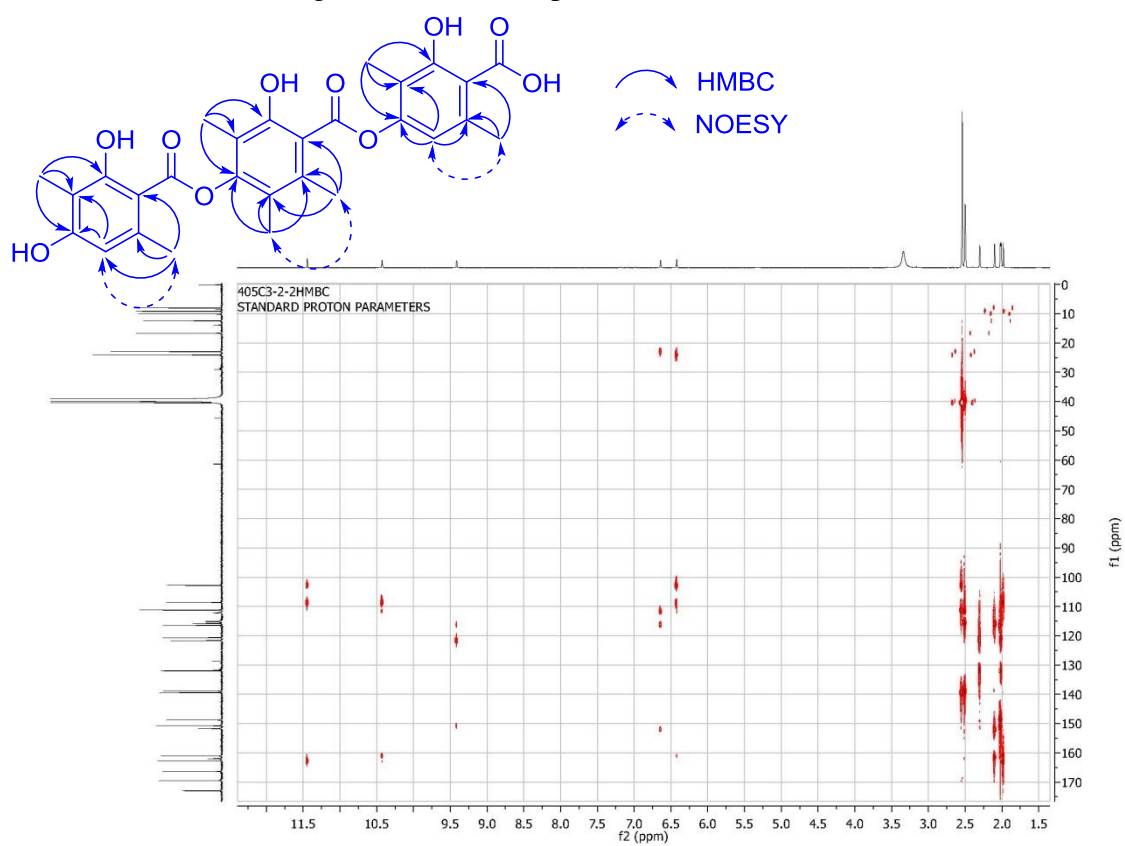

Figure S46 HMBC spectrum of **7** in DMSO-*d*<sub>6</sub>

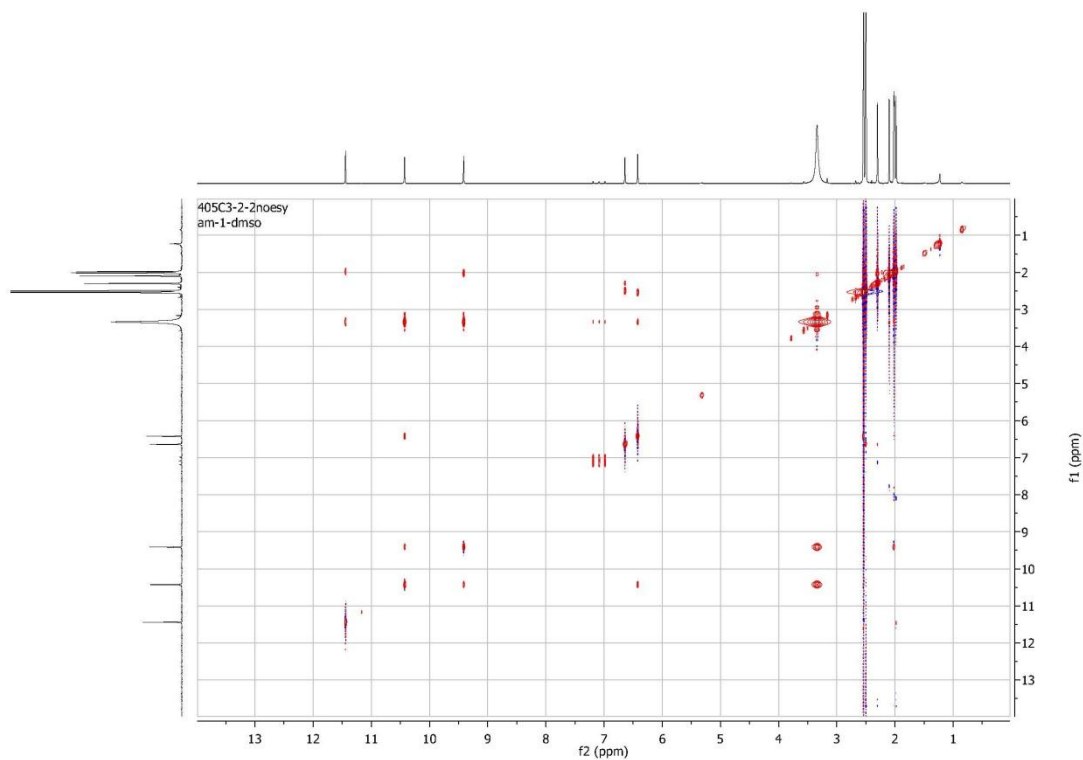

Figure S47 NOESY spectrum of **7** in DMSO-*d*<sub>6</sub>

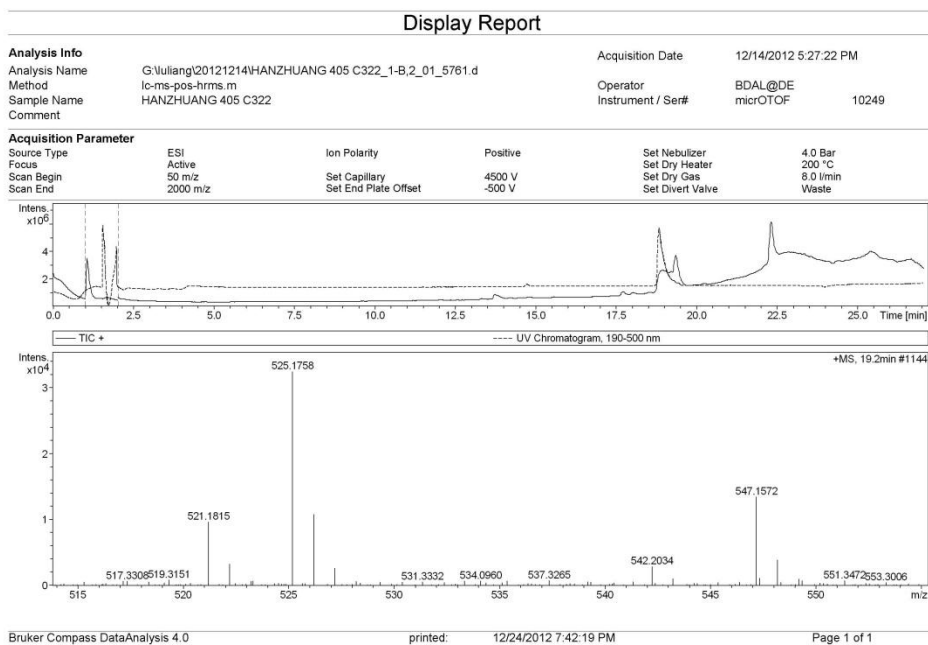

Figure S48 HRESIMS spectrum of **7**

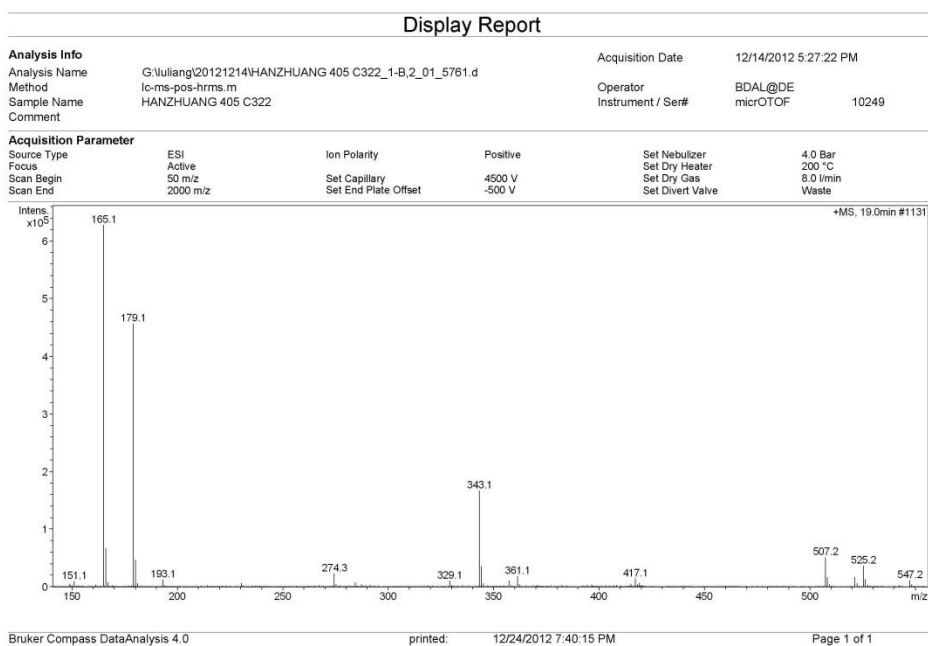

Figure S49 ISCID spectrum of **7**

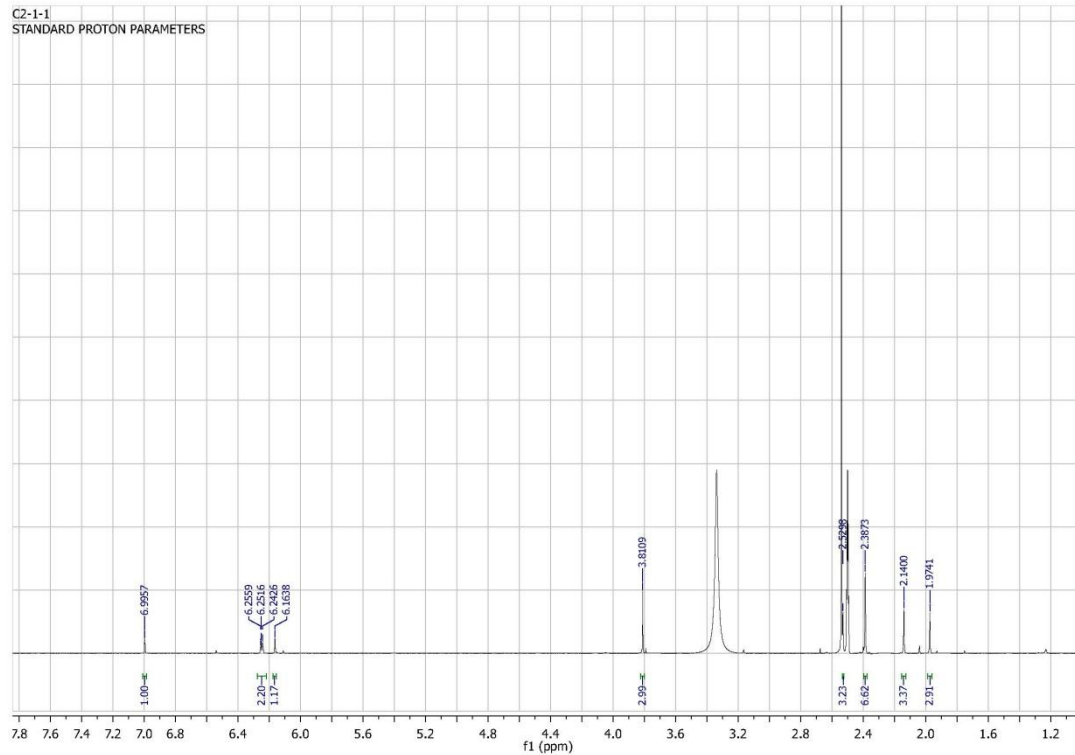

Figure S50  $^1\text{H}$  NMR spectrum of **8** in  $\text{DMSO-}d_6$  (500 MHz)

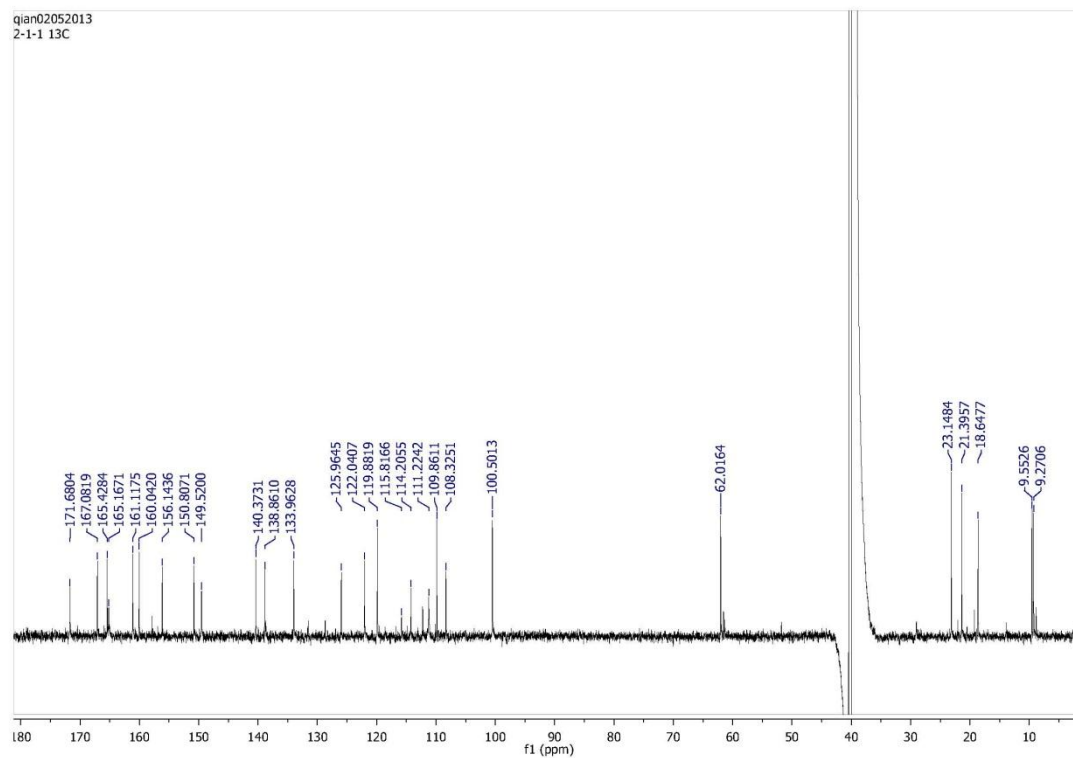

Figure S51  $^{13}\text{C}$  NMR spectrum of **8** in  $\text{DMSO-}d_6$  (125 MHz)

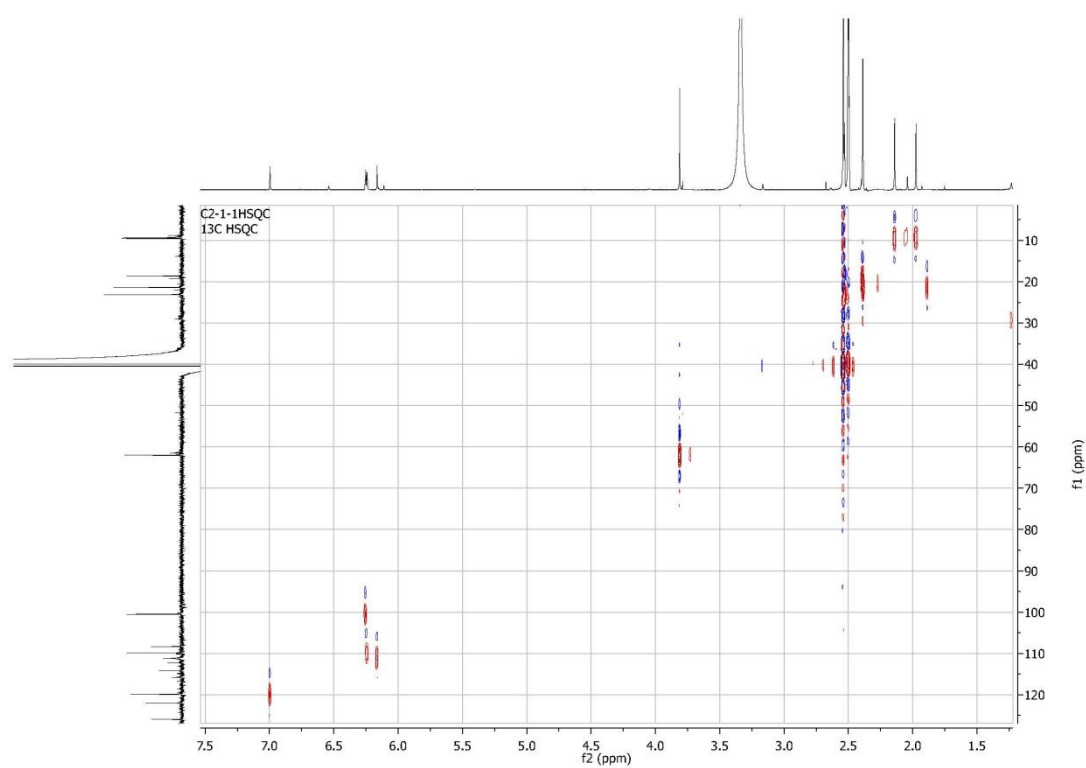

Figure S52 HMQC spectrum of **8** in  $\text{DMSO-}d_6$

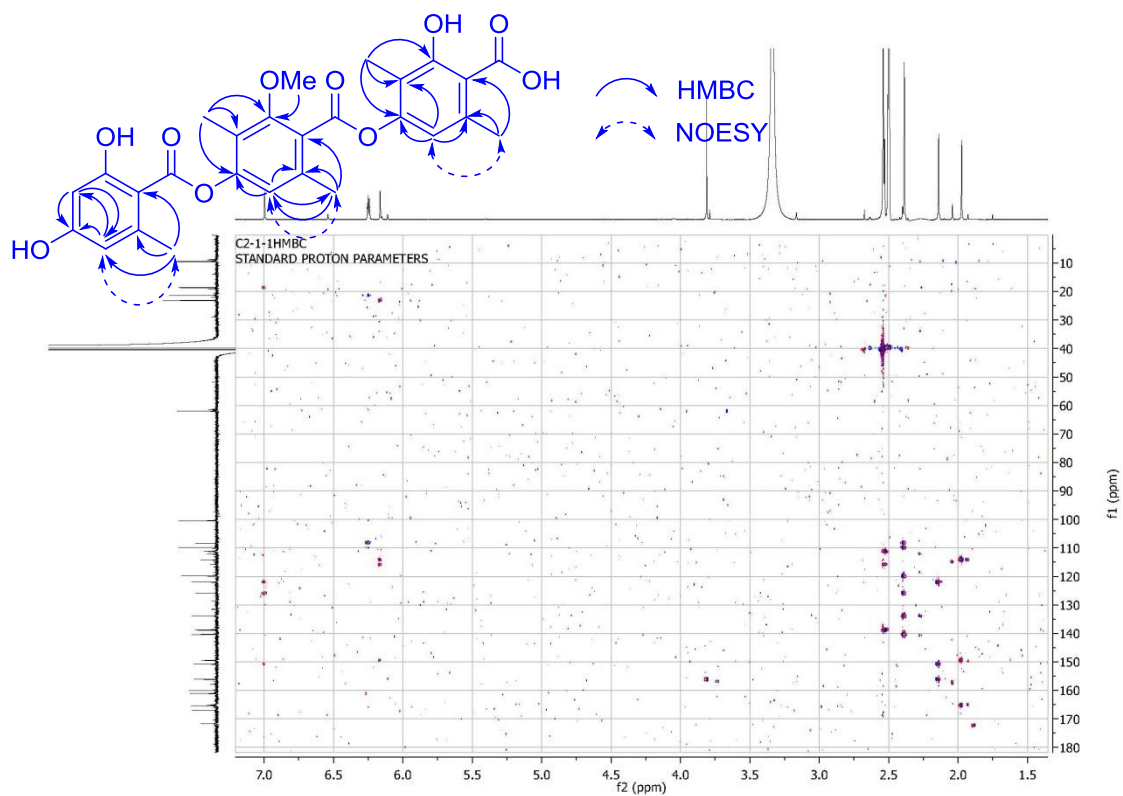

Figure S53 HMBC spectrum of **8** in DMSO- $d_6$

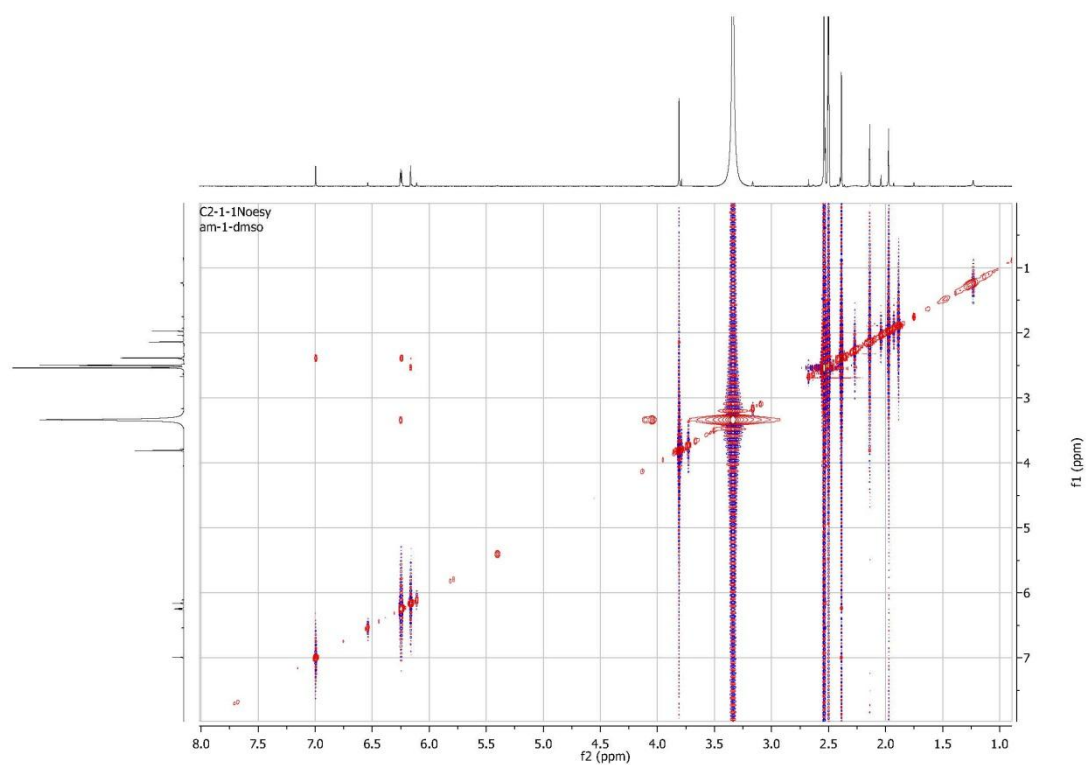

Figure S54 NOESY spectrum of **8** in DMSO- $d_6$

| Analysis Info |                                                   | Acquisition Date |         | 12/15/2012 12:16:23 PM |                |
|---------------|---------------------------------------------------|------------------|---------|------------------------|----------------|
| Analysis Name | G:\HAN Zhuang\20121214\HANZHUANG 405 C2-1-1_1-C,5 | Operator         | BDAL@DE | Instrument / Ser#      | microTOF 10249 |
| Method        | lc-ms-pos-hrms.m                                  |                  |         |                        |                |
| Sample Name   | HANZHUANG 405 C2-1-1                              |                  |         |                        |                |
| Comment       |                                                   |                  |         |                        |                |

  

| Acquisition Parameter |          | Ion Polarity         |        | Positive         |        | Set Nebulizer  |        | 4.0 Bar    |           |
|-----------------------|----------|----------------------|--------|------------------|--------|----------------|--------|------------|-----------|
| Source Type           | ESI      | Focus                | Active | Set Capillary    | 4500 V | Set Dry Heater | 200 °C | Scan Begin | 8.0 l/min |
| Scan End              | 2000 m/z | Set End Plate Offset | -500 V | Set Divert Valve | Waste  |                |        |            |           |

  

Intensity vs Time [min]

  

+MS, 17.7min #1055

m/z

  

Bruker Compass DataAnalysis 4.0
printed: 12/31/2012 1:42:13 PM
Page 1 of 1

Figure S55 HRESIMS spectrum of **8**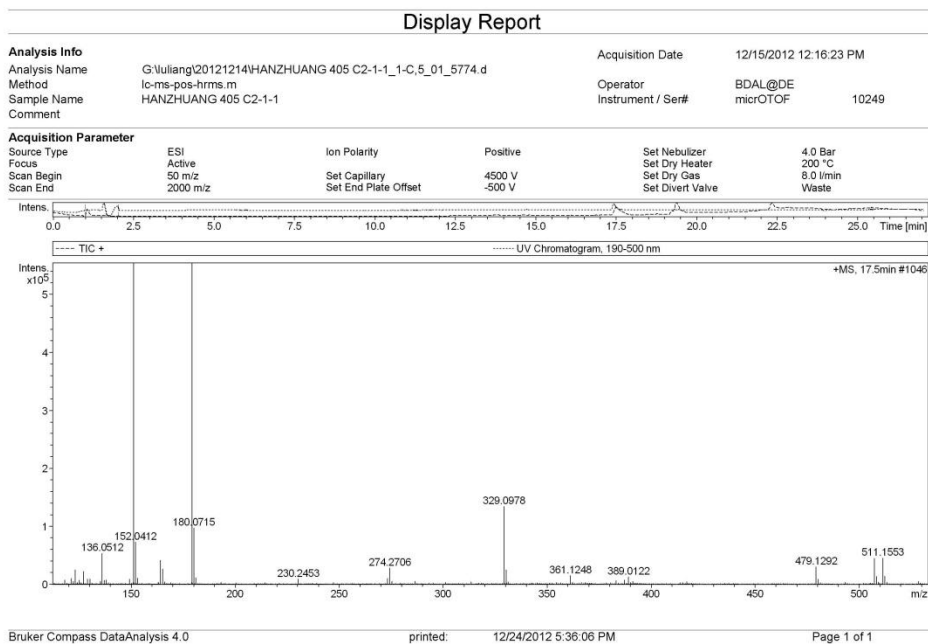Figure S56 ISCID spectrum of **8**

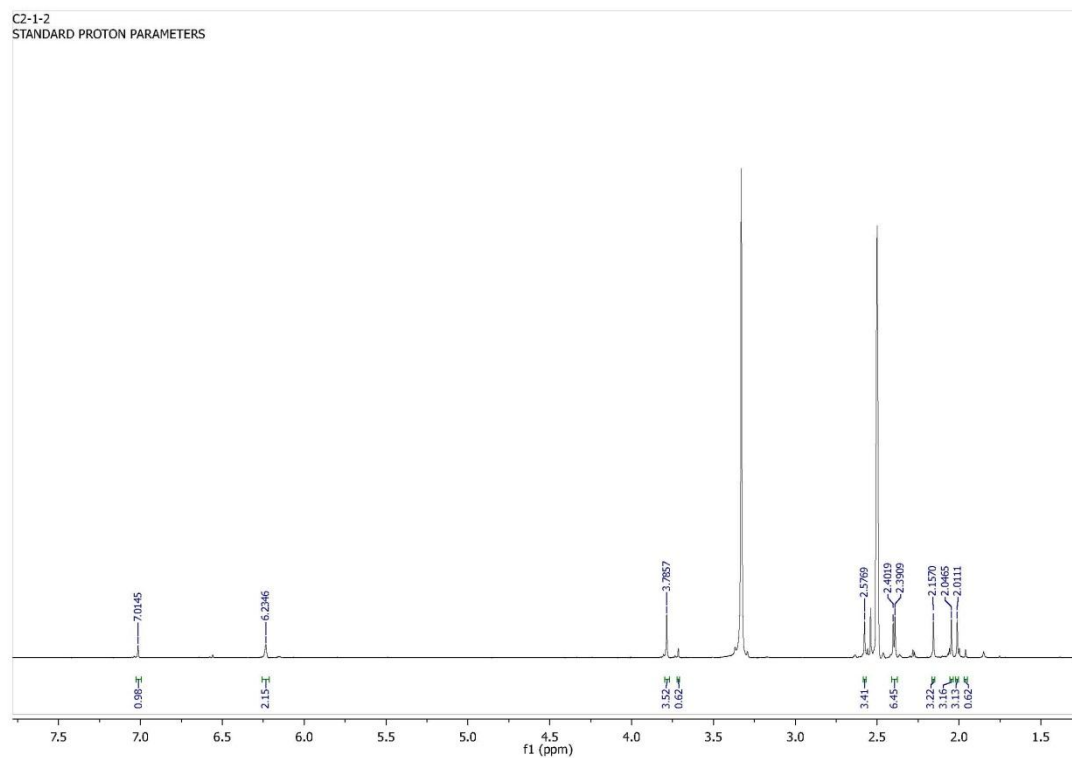

Figure S57  $^1\text{H}$  NMR spectrum of **9** in  $\text{DMSO-}d_6$  (500 MHz)

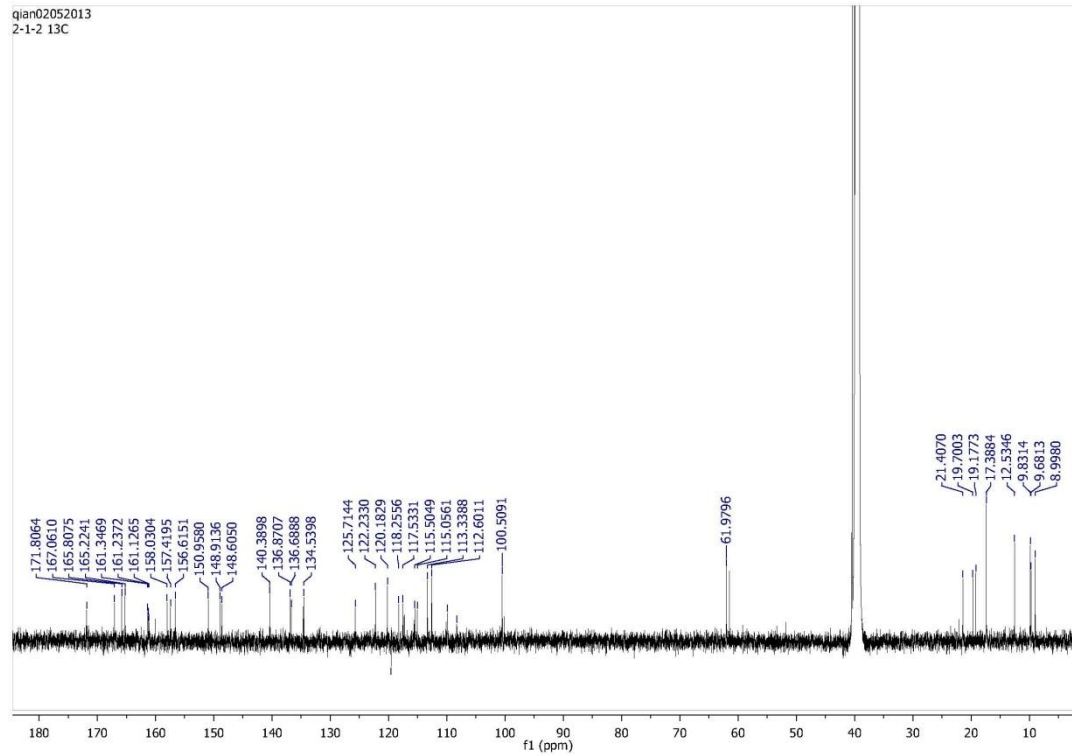

Figure S58  $^{13}\text{C}$  NMR spectrum of **9** in  $\text{DMSO-}d_6$  (125 MHz)

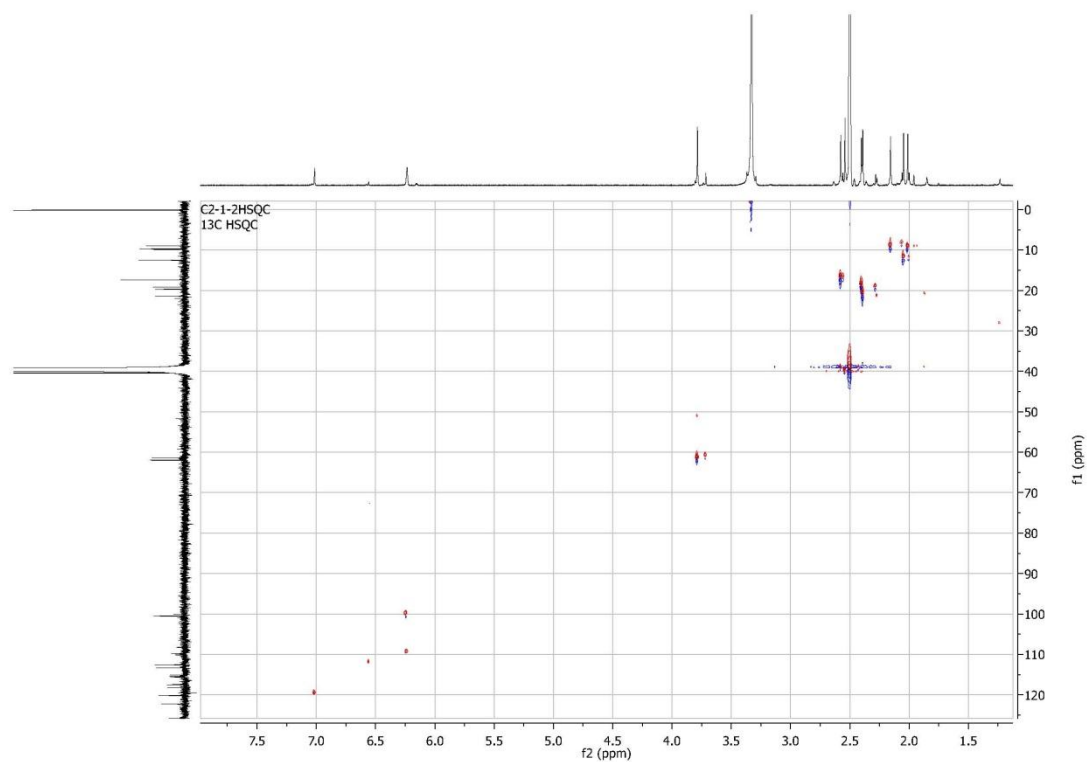

Figure S59 HMQC spectrum of **9** in DMSO- $d_6$

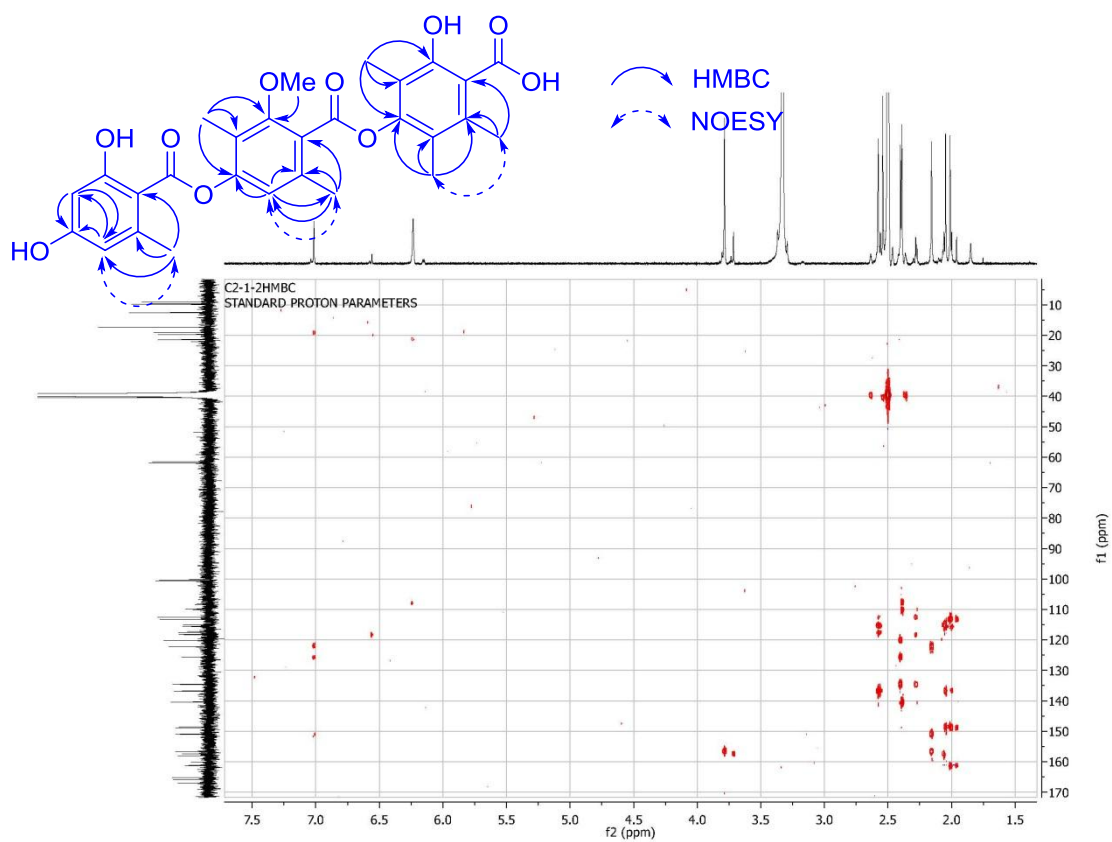

Figure S60 HMBC spectrum of **9** in DMSO- $d_6$

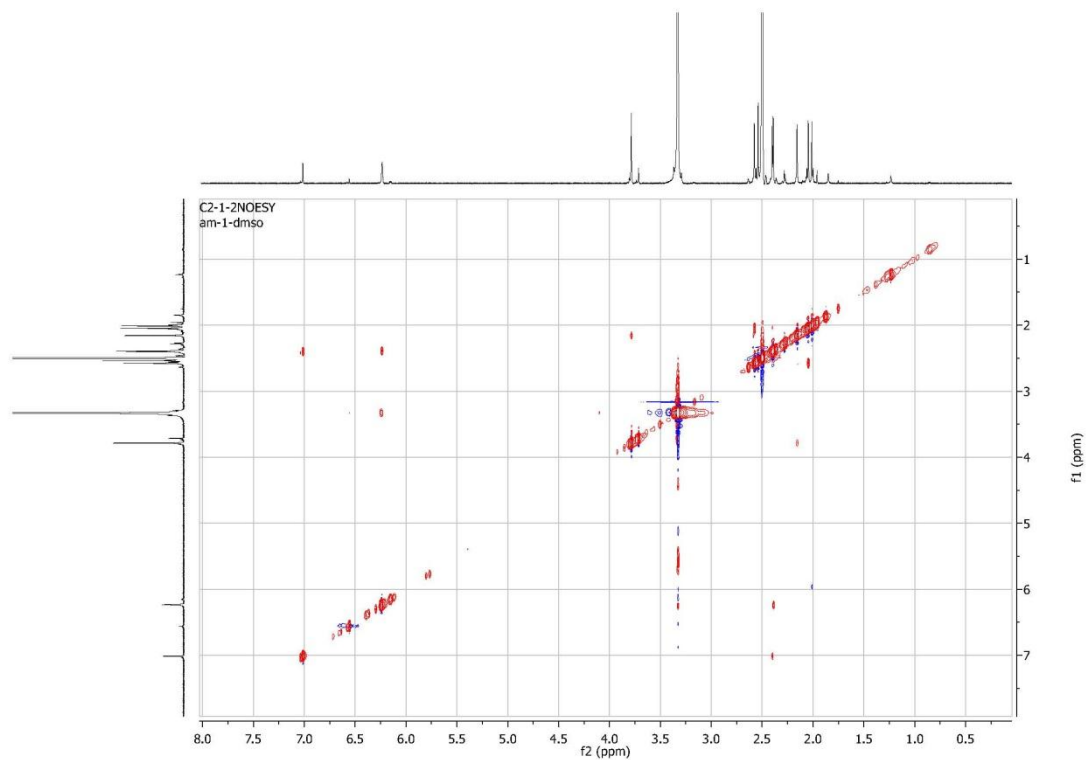

Figure S61 NOESY spectrum of **9** in DMSO-*d*<sub>6</sub>

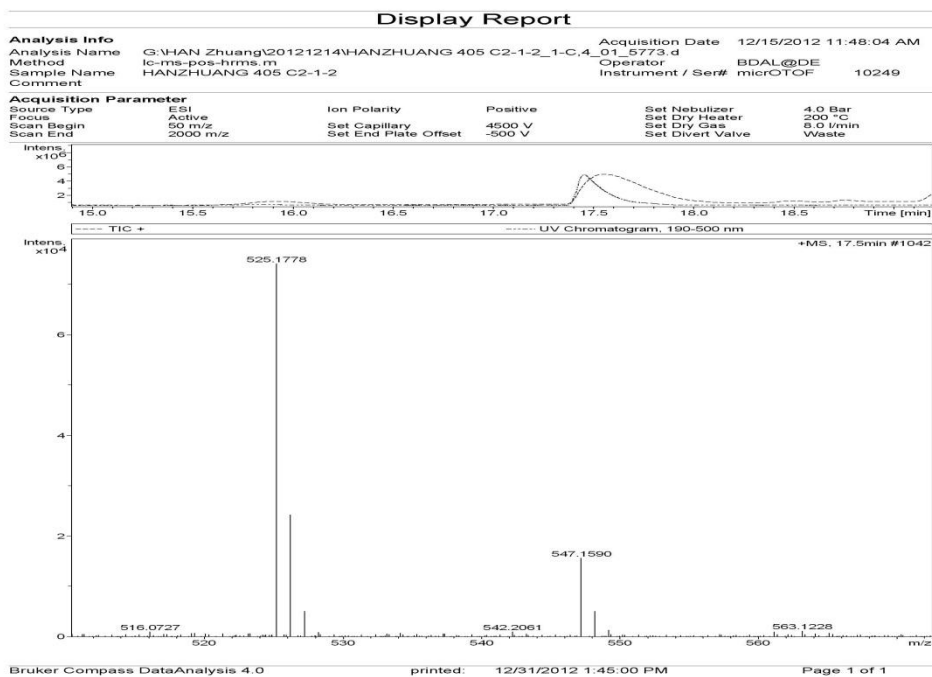

Figure S62 HRESIMS spectrum of **9**

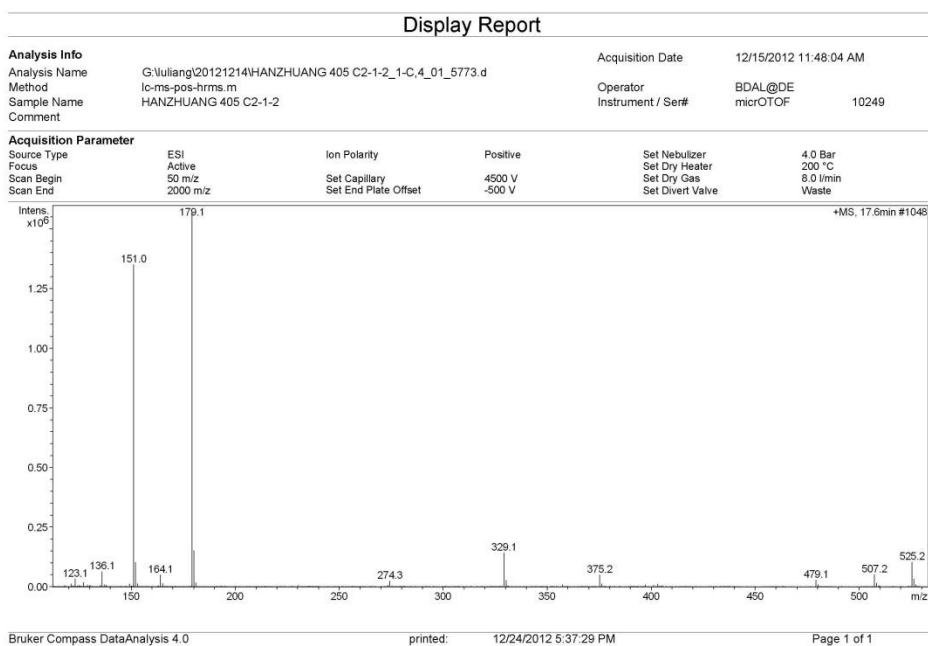

Figure S63 ISCID spectrum of **9**

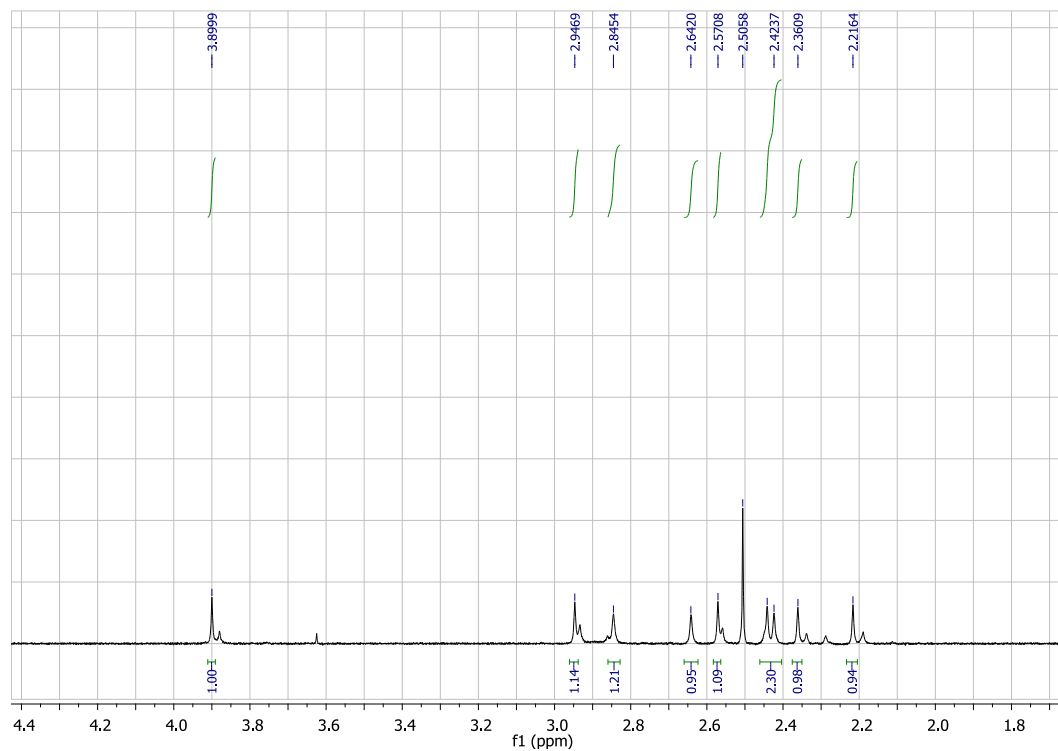

Figure S64  $^1\text{H}$  NMR spectrum of **10** in  $\text{DMSO-}d_6$  (500 MHz)

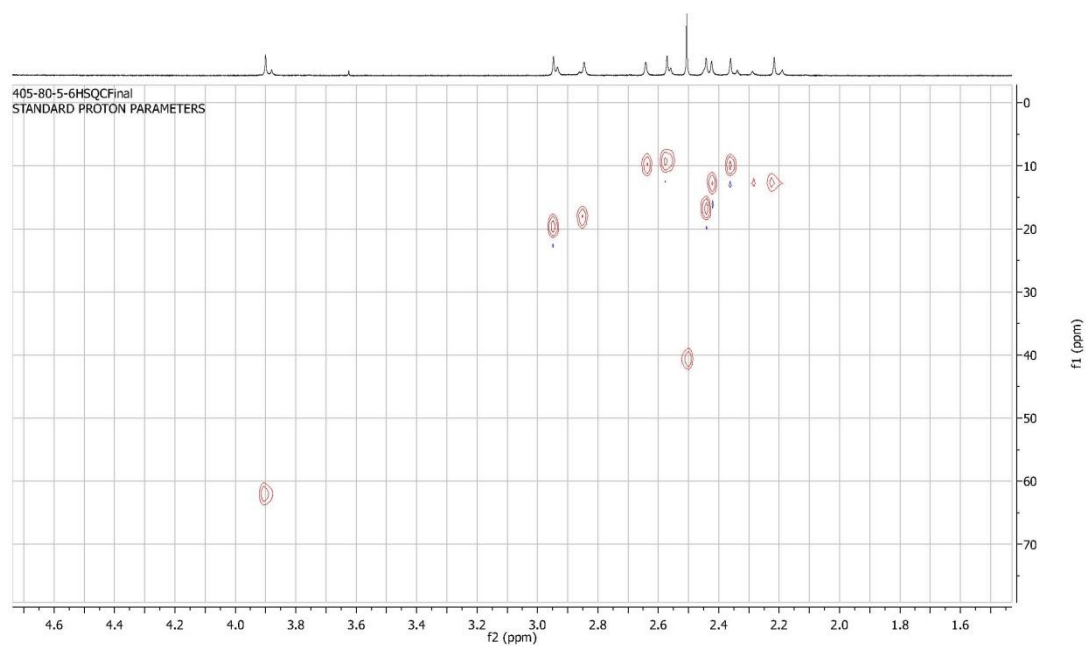

Figure S65 HMQC spectrum of **10** in DMSO-*d*<sub>6</sub>

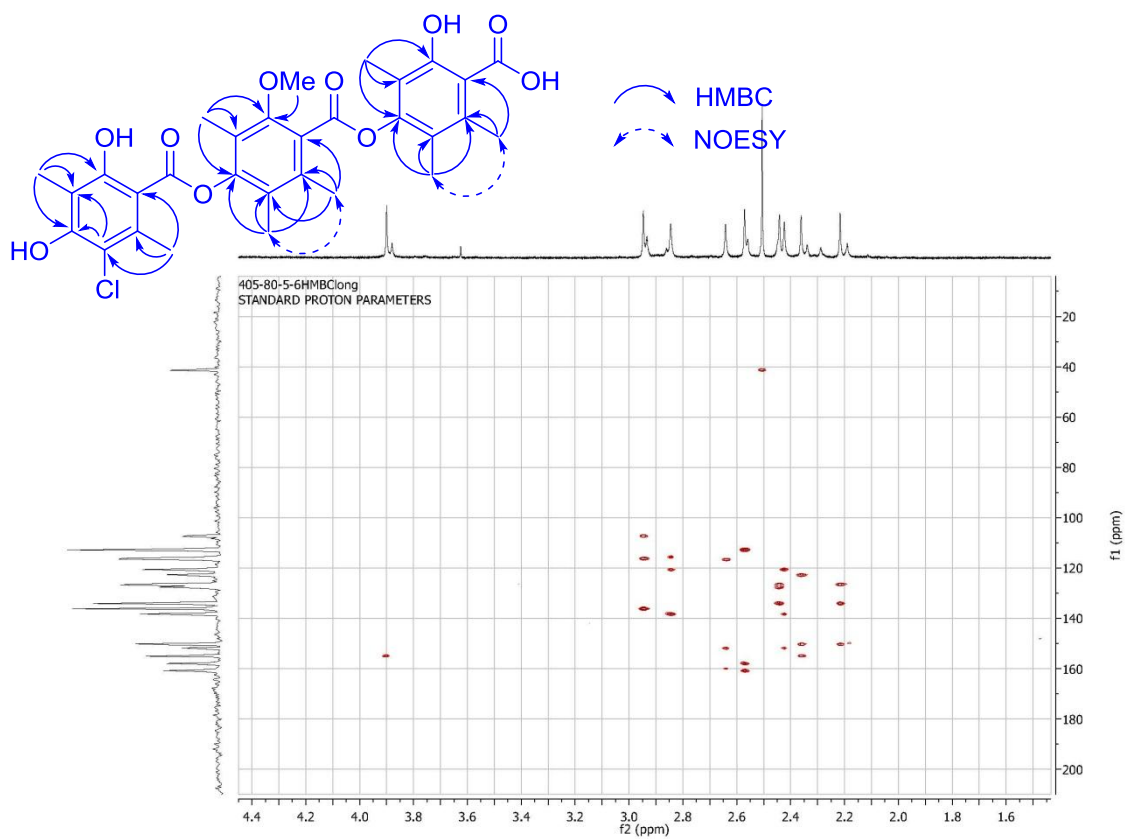

Figure S66 HMBC spectrum of **10** in DMSO-*d*<sub>6</sub>

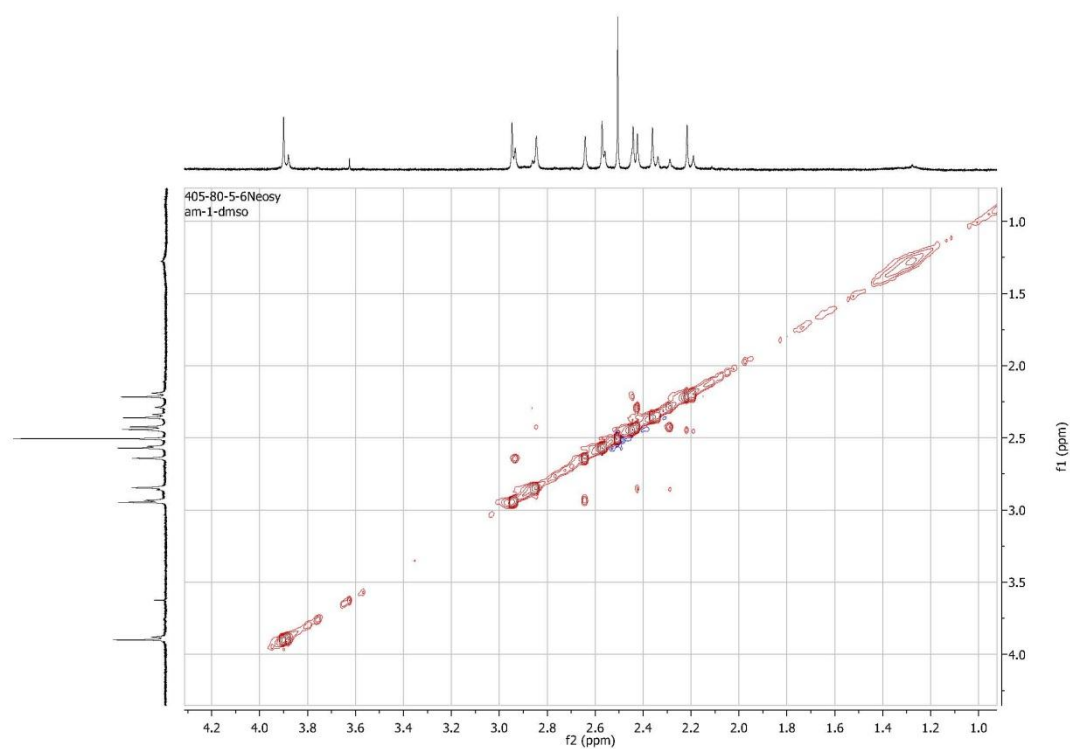

Figure S67 NOESY spectrum of **10** in DMSO-*d*<sub>6</sub>

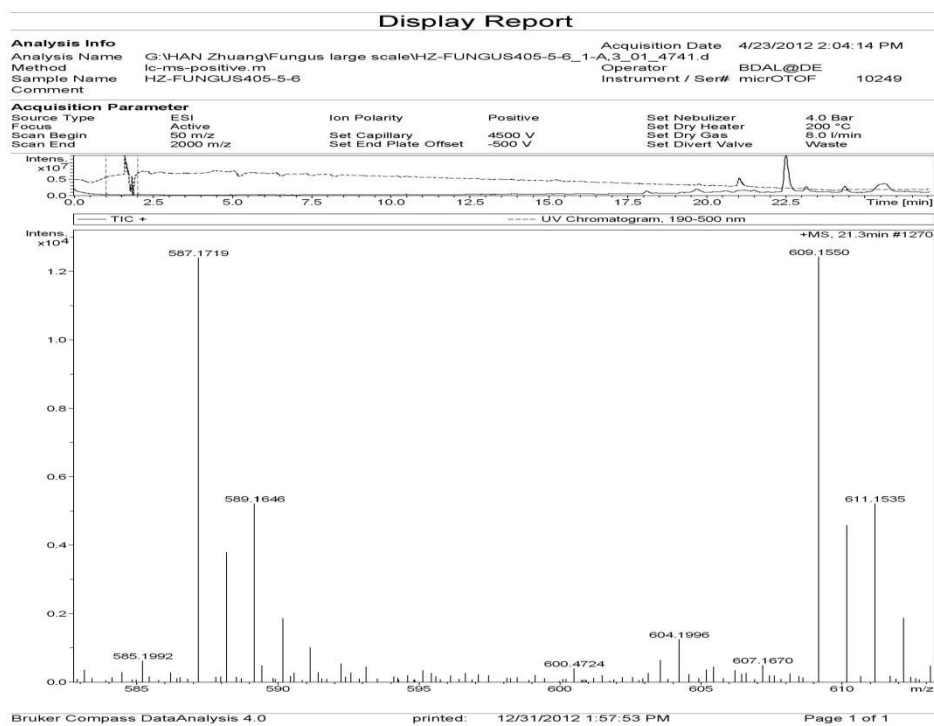

Figure S68 HRESIMS spectrum of **10**

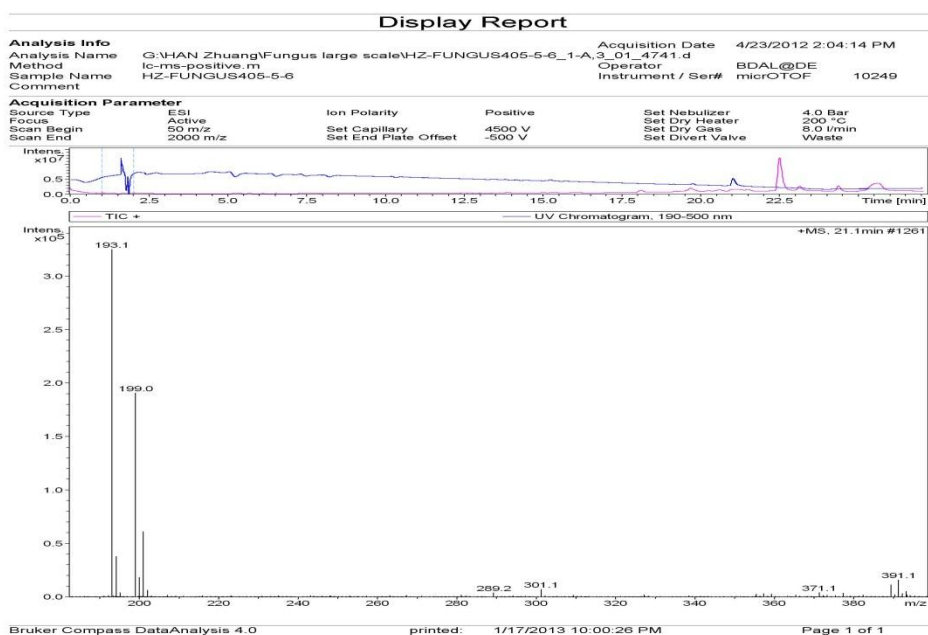

Figure S69A ISCID spectra of 10

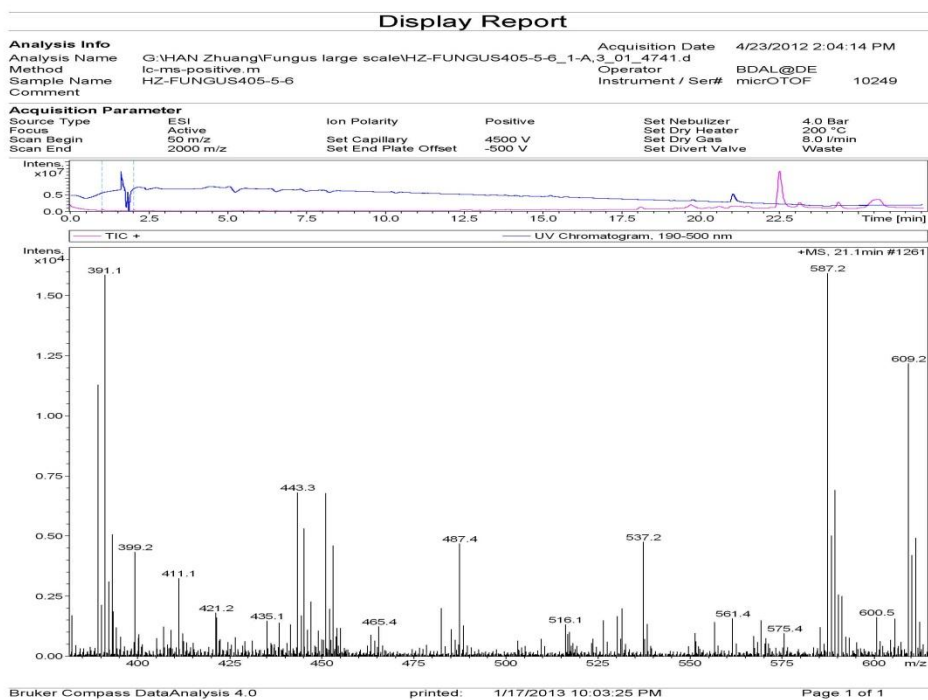

Figure S69B ISCID spectra of 10

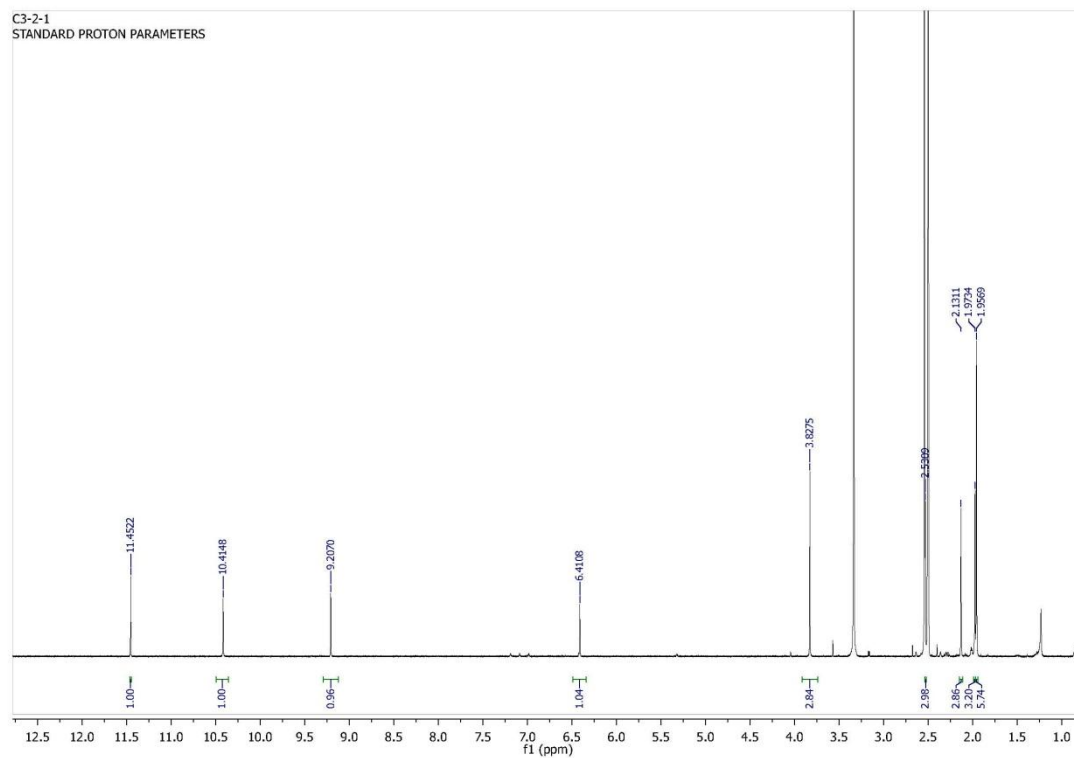

Figure S70  $^1\text{H}$  NMR spectrum of **11** in  $\text{DMSO-}d_6$  (500 MHz)

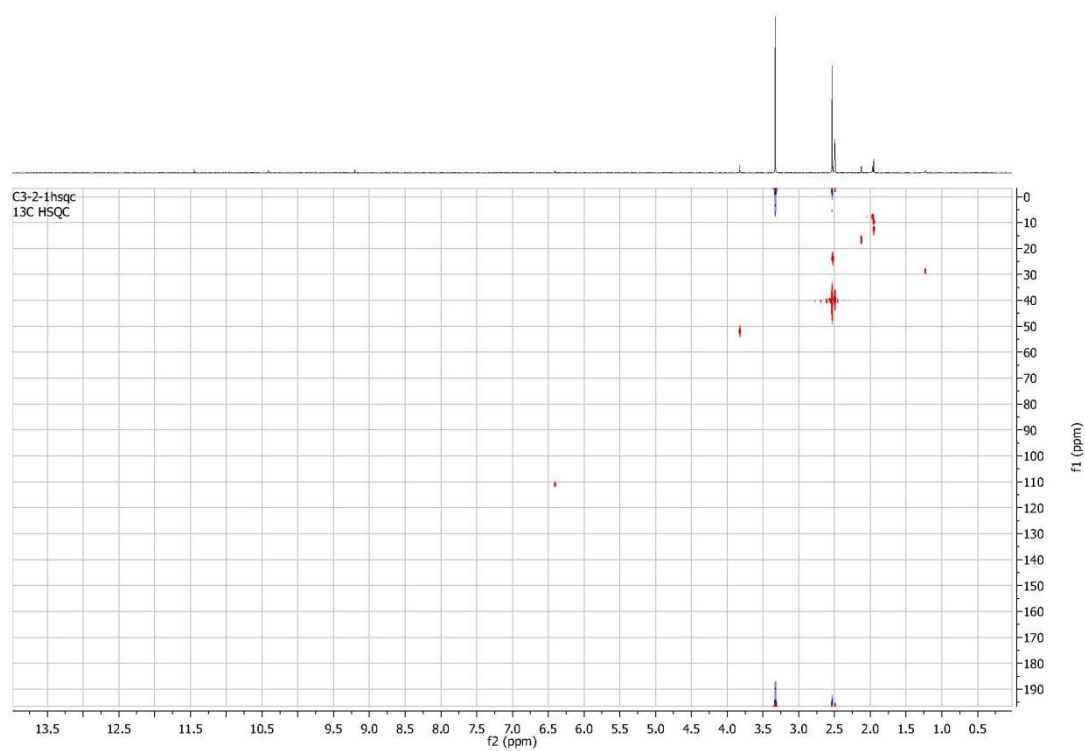

Figure S71 HMQC spectrum of **11** in  $\text{DMSO-}d_6$

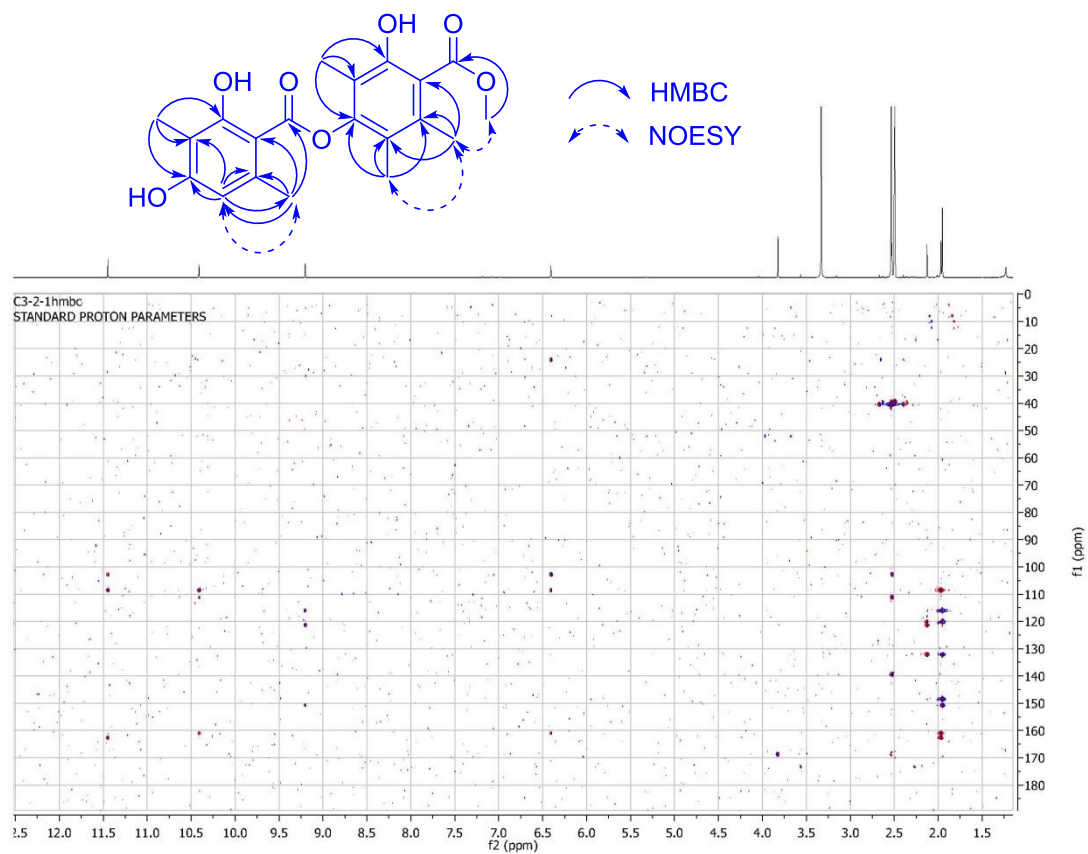

Figure S72 HMBC spectrum of **11** in DMSO-*d*<sub>6</sub>

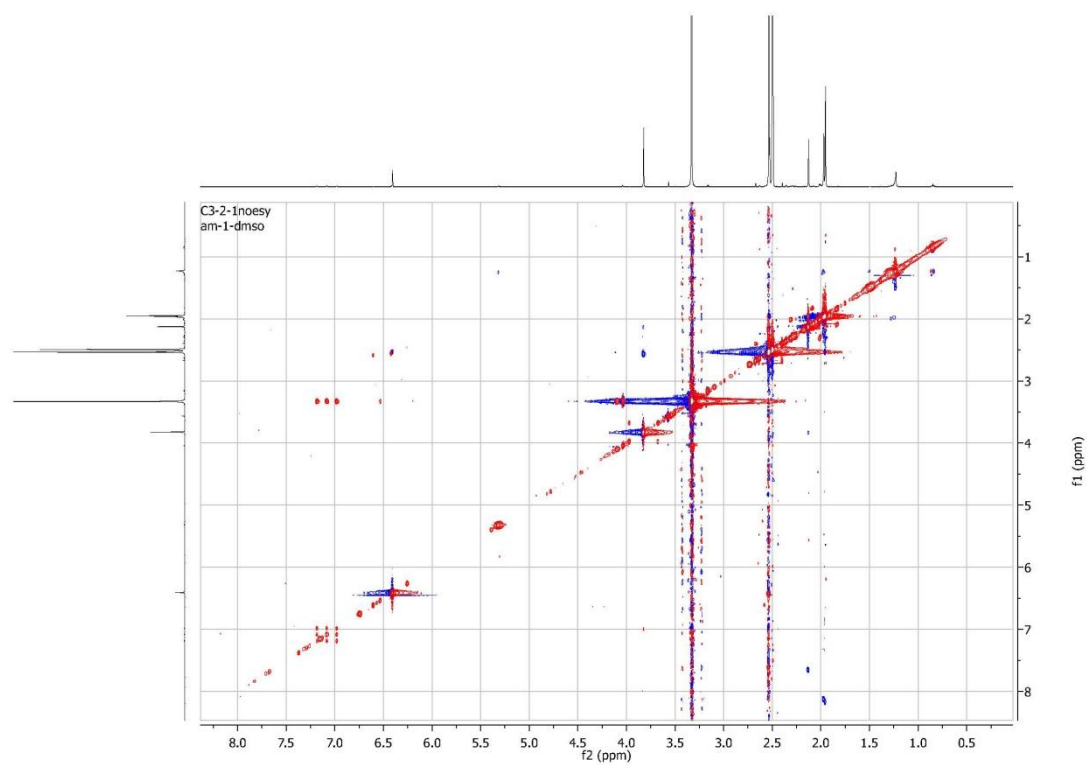

Figure S73 NOESY spectrum of **11** in DMSO-*d*<sub>6</sub>

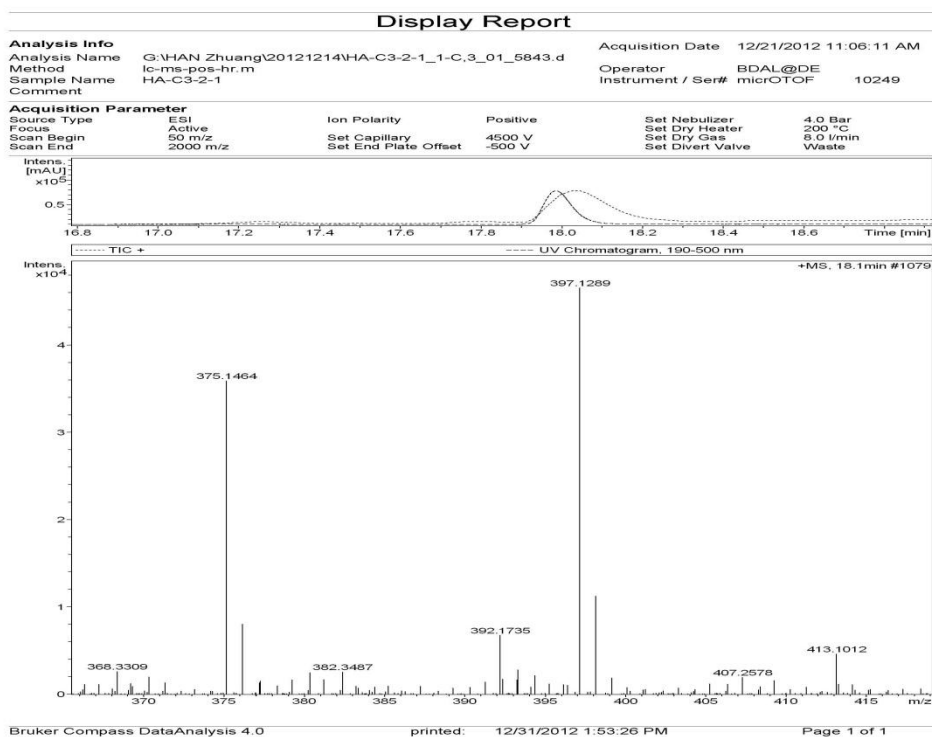

Figure S74 HRESIMS spectrum of **11**

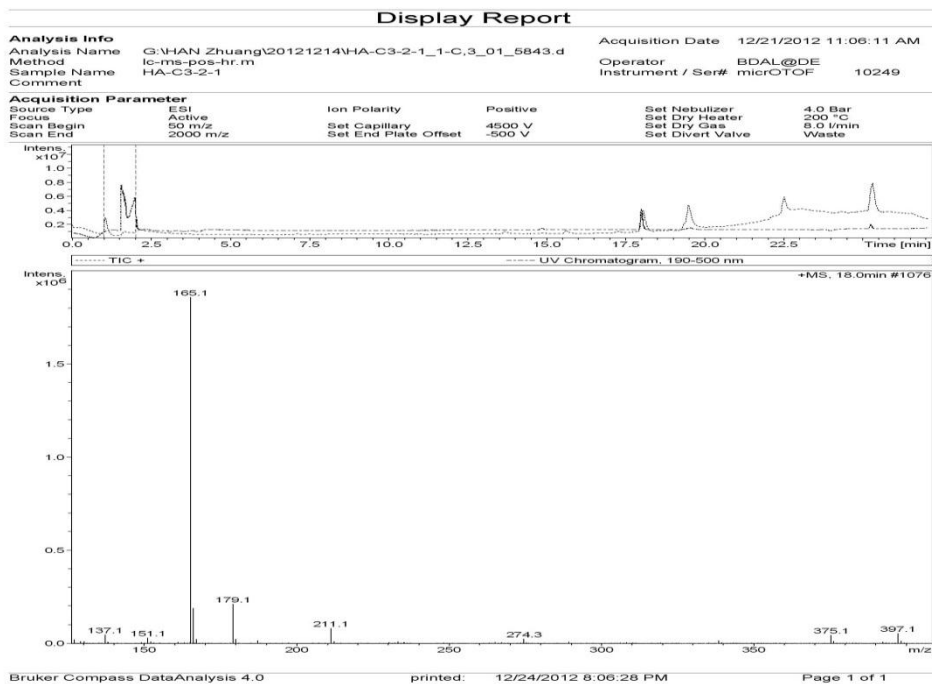

Figure S75 ISCID spectrum of **11**
